1 *Hammondia hammondi* has a developmental program *in vitro* that mirrors its stringent two host  
2 life cycle.

3

4

5

6

7

8 Sarah L. Sokol<sup>1¶</sup>, Abby S. Primack<sup>1¶</sup>, Sethu C. Nair<sup>1</sup>, Zhee S. Wong<sup>1</sup>, Maiwase Tembo<sup>1</sup>, J.P.

9 Dubey<sup>2</sup>, Shiv K. Verma<sup>2</sup> and Jon P. Boyle<sup>1\*</sup>

10

11 <sup>1</sup>Department of Biological Sciences, Dietrich School of Arts and Sciences, University of

12 Pittsburgh, Pittsburgh, PA. 15260

13

14 <sup>2</sup>Animal Parasitic Diseases Laboratory, Beltsville Agricultural Research Center, Agricultural

15 Research Service, U.S. Department of Agriculture, Beltsville, Maryland. 20705

16

17

18 \*Corresponding author:

19 Email: [boylej@pitt.edu](mailto:boylej@pitt.edu) (JPB)

20

21

22 <sup>¶</sup>These authors contributed equally to this work.

23

## 24 **Abstract**

25 *Hammondia hammondi* is the nearest relative of *Toxoplasma gondii*, but unlike *T. gondii* is  
26 obligately heteroxenous. We have compared *H. hammondi* and *T. gondii* development *in vitro*  
27 and identified multiple *H. hammondi*-specific growth states. Despite replicating slower than *T.*  
28 *gondii*, *H. hammondi* was resistant to pH-induced tissue cyst formation early after excystation.  
29 However, in the absence of stress *H. hammondi* spontaneously converted to a terminally  
30 differentiated tissue cyst stage while *T. gondii* did not. Cultured *H. hammondi* could infect new  
31 host cells for up to 8 days following excystation, and this period was exploited to generate stably  
32 transgenic *H. hammondi*. Coupled with RNAseq analyses, our data clearly show that *H.*  
33 *hammondi* zoites grow as stringently regulated life stages that are fundamentally distinct from *T.*  
34 *gondii* tachyzoites and bradyzoites.

## 36 **Introduction**

37 *Toxoplasma gondii*, the causative agent of toxoplasmosis, is a globally ubiquitous  
38 apicomplexan parasite capable of infecting all warm-blooded animals, including approximately  
39 one-third of the human population (1-4). Although generally asymptomatic in immunocompetent  
40 individuals, *T. gondii* is capable of causing disease in the immunocompromised (including  
41 HIV/AIDS patients), developing neonates, and occasionally healthy individuals (5-8). The global  
42 ubiquity of *T. gondii* is due, at least in part, to its broad host range and ability to persist  
43 undetected in an immunocompetent host, recrudescing following immunosuppression (9, 10).  
44 These characteristics are lacking in the nearest extant relative of *T. gondii*, *Hammondia*  
45 *hammondi*. Despite sharing >99% of their genes in near perfect synteny (11) and the same  
46 definitive host (2), *H. hammondi* is only known to naturally infect rodents, goats, and roe deer (2,  
47 12) where it appears to be relatively avirulent. In addition to its comparatively limited host range,  
48 *H. hammondi* has an obligately heteroxenous life cycle (2), where intermediate host stages (i.e.,

49 tissue cysts) are only capable of infecting the definitive host, and definitive host stages (i.e.,  
50 oocysts) can only infect an intermediate host.

51 In addition to these life cycle differences, these parasite species have *in vitro* behaviors  
52 that mirror their differences *in vivo*. Specifically, when *T. gondii* sporozoites (VEG strain; (13))  
53 are used to initiate infections in human host cells, they undergo a period of rapid replication,  
54 after which their growth rate slows, and this period is marked by a subpopulation of parasites  
55 spontaneously converting to bradyzoite (e.g., cyst-like) stages (13). However *T. gondii* parasites  
56 cultivated in this manner still undergo multiple cycles of replication, egress and reinvasion, and  
57 can be propagated indefinitely (13). In contrast, when *H. hammondi* sporozoites are put into  
58 tissue culture they replicate more slowly than *T. gondii* (replication predicted to occur once  
59 every 24 hours as opposed to once every 6 hours for *T. gondii*) (13, 14), have not been  
60 observed to be capable of subculture (either via passage of culture supernatants or after  
61 scraping and trypsinization) (15) (14)), and ultimately form bradyzoite cyst-like stages that are  
62 infectious to the definitive (but not the rodent intermediate) host (15) (14).

63 While the molecular determinants that control these dramatic phenotypic differences are  
64 unknown, the fact life cycle restriction in *H. hammondi* occurs *in vitro* provides a unique  
65 opportunity to identify key aspects of *H. hammondi* biology that underlie its restrictive life cycle  
66 and, by contrast, allow for elucidation of the cellular and molecular differences in *T. gondii* that  
67 underlie its comparatively flexible life cycle. It is important to note that with respect to other  
68 apicomplexans (including *N. caninum* and *Plasmodium* spp.), it is the *T. gondii* life cycle that is  
69 atypical; the majority of apicomplexans are obligately heteroxenous. One hypothesis is that *T.*  
70 *gondii* has been released from an ancestral state characterized by a restrictive life cycle and  
71 that this ancestral phenotype was more similar to that of *H. hammondi*.

72 Here, we have characterized *in vitro* excystation, invasion, and replication rate of *T.*  
73 *gondii* (VEG strain; (16, 17)) and *H. hammondi* (HhCatEth1 and HhCatAmer (12, 18)) from  
74 sporozoite-initiated infections, and our work represents the most thorough head-to-head

75 comparison of the intermediate host life stages of these genetically similar but phenotypically  
76 distinct parasite species. We have also compared the timing and frequency of *in vitro*  
77 differentiation and uncovered novel aspects that further illustrate the rigidity of the *H. hammondi*  
78 life cycle. Finally, we report the first ever transcriptome from replicating *H. hammondi*, and  
79 identified a transcriptional profile that reflects its slow growth and propensity for cyst formation,  
80 which fully differentiates it from *T. gondii*. Using this information, we were able to successfully  
81 subculture *H. hammondi in vitro* and in mice, as well as define the precise window of infectivity  
82 and replicative capacity. With these limits in mind, we generated the first ever transgenic *H.*  
83 *hammondi*, opening up the door to future molecular and genetic studies in this poorly  
84 understood parasite species.

85

## 86 **Results**

### 87 ***T. gondii* and *H. hammondi* have similar ability to infect host cells.**

88 While *T. gondii* oocysts and sporozoites have been studied extensively for their ability to  
89 cause disease in intermediate hosts (13, 19, 20), very little is known about the biology of *H.*  
90 *hammondi* oocysts and sporozoites. We compared sporozoite yield and infectivity between *T.*  
91 *gondii* and *H. hammondi* using oocyst preparations derived from multiple cat infections and  
92 consistently found that the yield of sporozoites from HhCatEth1 was lower than that from  
93 TgVEG oocysts. Average HhCatEth1 sporozoite yield (Mean=5.0 SD=1.2, n=21) was  
94 significantly lower than TgVEG yield (Mean=11.6 SD=2.13, n=10) (Fig 1A; P=0.02). While  
95 excystation yields were lower for HhCatEth1, a linear regression demonstrates no significant  
96 relationship between sporozoite yield as a product of oocyst age for HhCatEth1 ( $P = 0.76$ ,  
97  $R^2 = 0.01$ ) or TgVEG ( $P = 0.63$ ,  $R^2 = 0.03$ ; Fig 1B). Given that sporozoite yields were different  
98 between species, we determined if there were differences in sporozoite infectivity by using  
99 vacuole formation as a proxy. Interestingly, TgVEG and HhCatEth1 sporozoites had similar

100 infectivity rates in HFFs, defined as the number of vacuoles counted as a fraction of number of  
101 vacuoles expected (HhCatEth1 0.12 +/- 0.02 N=2; TgVEG; 0.10 +/- 0.04 N=2  $P=0.64$ ).

102

103 ***H. hammondi* displays differences in *in vitro* replication rate when compared to *T.***  
104 ***gondii*.**

105 Although *H. hammondi* is capable of limited *in vitro* growth, the dynamics of these  
106 infections with regards to replication rate has yet to be determined. We performed two *in vitro*  
107 assays with different cat-derived oocyst preparations to quantify the replication rate of *H.*  
108 *hammondi* (HhCatEth1) and *T. gondii* (TgVEG) sporozoites. As expected from previous work,  
109 these assays showed that HhCatEth1 has a slower division rate than TgVEG (Fig 2A). In both  
110 replicates, we observed significant growth differences between TgVEG during all 3 days of  
111 quantification (\*\*  $P= <0.01$ , \*\*\*\*  $P= <0.0001$ ; Fig 2B,C); however, we only observed significant  
112 growth differences between day 1 and day 3 in one replicate (\*\*  $P= <0.01$ ; Fig 2C). Replication  
113 proceeded in TgVEG with an division rate of 2-3x that of HhCatEth1, based on median vacuole  
114 size (Table 1, Fig 2D and E). Overall, we've calculated the maximum replication rate of TgVEG  
115 to be once every 9.6 hours (Day 2) and once every 18 hours for HhCathEth1 (Day 3).

116 **Table 1: Median and maximum parasites per vacuole during 1, 2, and 3 DPI for TgVEG**  
117 **and HhCatEth1.**

|                       | Day 1           | Day 2           | Day 3           |
|-----------------------|-----------------|-----------------|-----------------|
|                       | Median, Maximum | Median, Maximum | Median, Maximum |
| HhCatEth1 Replicate 1 | 1, 1            | 1, 2            | 2, 4            |
| HhCatEth1 Replicate 2 | 1, 2            | 2, 4            | 2, 16           |

|                              |      |        |        |
|------------------------------|------|--------|--------|
| <b>TgVEG<br/>Replicate 1</b> | 2, 2 | 2, 16  | 4, 16+ |
| <b>TgVEG<br/>Replicate 2</b> | 2, 4 | 4, 16+ | 8, 16+ |

118

119 **Both *T. gondii* and *H. hammondi* spontaneously form tissue cysts, but do so with**  
120 **different dynamics and efficacy.**

121 *T. gondii* and *H. hammondi* are both known to spontaneously differentiate into  
122 bradyzoites and form tissue cysts during *in vitro* culture(2). *T. gondii* sporozoite derived  
123 infections spontaneous express the bradyzoite antigen 1 (BAG1) after 6 days of growth (13).  
124 Yet, the temporal dynamics of differentiation and tissue cyst formation remain unknown in *H.*  
125 *hammondi*. To characterize the efficiency of tissue cyst formation, we infected HFFs with  
126 TgVEG and HhCatEth1 sporozoites and stained them with *Dolichos biflorus* Agglutinin (DBA) at  
127 4 and 15 DPI to identify tissue cysts. All vacuoles in TgVEG and HhCatEth1 were DBA-negative  
128 at 4 DPI. At 15 DPI, 15% (34/355) of TgVEG vacuoles were DBA-positive, ~80% (152/182) of  
129 *H. hammondi* vacuoles were DBA-positive (P<0.0001; Fig 3A, B). To more precisely determine  
130 the temporal dynamics of tissue cyst formation, we performed excystation and infected HFFs  
131 with TgVEG (Fig 3C) or HhCatAmer (Fig 3D) sporozoites and quantified DBA-positive vacuole  
132 formation over the course of 23 days. As expected, we found that both TgVEG and HhCatAmer  
133 spontaneously formed DBA-positive tissue cysts (as early as 8 and 12 DPI, respectively) but by  
134 23 DPI 100% of all HhCatAmer vacuoles were DBA-positive, while DBA-positive TgVEG  
135 vacuoles never exceeded 20% (Fig 3C,D). These data show that *H. hammondi* undergoes a  
136 much more rigid developmental program during *in vitro* cultivation compared to *T. gondii*,  
137 resulting in 100% tissue cyst conversion.

138

139 ***H. hammondi* is resistant to *in vitro* conditions that induce cyst formation in *T.***

140 ***gondii*.**

141 While *T. gondii* can spontaneously form tissue cysts following an *in vitro* sporozoite  
142 infection, it can also be chemically induced to form bradyzoites using treatments such as  
143 alkaline pH (13). The responsiveness of *H. hammondi* to these stressors is not known. To  
144 determine if we can induce tissue cyst formation in *H. hammondi* prior to its natural progression  
145 to a 100% DBA-positive population, we exposed *T. gondii* and *H. hammondi* sporozoites  
146 (TgVEG and HhCatAmer) to high pH bradyzoite induction media during 2-4 DPI. Based on DBA  
147 staining, we found that while 35% of TgVEG vacuoles grown in bradyzoite induction media for 2  
148 days were DBA-positive (104 out of 297), we could not find a single DBA-positive HhCatAmer  
149 vacuole (out of 59 vacuoles; Fig 4A,B). Although a decrease in parasite replication is linked to  
150 bradyzoite formation (13) (21), we did not observe a significant difference in the number of  
151 parasites per vacuole between TgVEG cultured at pH 7.2 and TgVEG at pH 8.2 ( $P=0.63$ ) or in  
152 HhCatAmer cultured at pH 7.2 and HhCatAmer at pH 8.2 ( $P=1.00$ ). We did, however, observe  
153 an expected significant difference in the number of parasites per vacuole between TgVEG and  
154 HhCatAmer in both conditions (\*\*  $P= 0.0045$ ; \*\*\*\*  $P= < 0.0001$ ) consistent with the fact that *T.*  
155 *gondii* and *H. hammondi* replicate at different rates (Fig 2). The pH resistance of *H. hammondi*  
156 is yet another trait that distinguishes this parasite from *T. gondii*, and provides further evidence  
157 that the *H. hammondi* developmental program is hard-wired and very difficult to disrupt.

158

159 ***H. hammondi* can be subcultured successfully *in vitro*.**

160 A key distinguishing feature of *H. hammondi* compared to all *Toxoplasma* strains studied  
161 to date is the inability to culture the parasites indefinitely *in vitro*. A consistent observation has  
162 been that when *H. hammondi* sporozoites are used to infect host cells (from multiple organisms  
163 including humans, cattle, and non-human primates), after a brief time in culture parasites do not  
164 retain the ability to infect new host cells (14, 15). To more precisely define the timing of this

165 phenotype, we subcultured *H. hammondi* sporozoites (by needle passage) at multiple times  
166 post-excystation (Fig 5A-B). We found that when *H. hammondi* zoites were mechanically  
167 released from their host cells, they were capable of infecting and replicating within new host  
168 cells for up to 8 days post-excystation (Fig 5C-F), after which we were unable to observe any  
169 evidence of parasite replication. In agreement with previous studies (2, 14, 15) we also  
170 observed that the number of visible *H. hammondi* vacuoles seems to disappear the longer the  
171 parasites were grown in culture. Additionally, we observed that vacuoles began to disappear  
172 after 7 DPI (Fig 5C-E). Vacuoles grew in size over this over 13 day incubation period, while new  
173 vacuoles derived from lysing and re-invading parasites (which would have comparatively  
174 smaller sizes) were never observed after 10 DPI (S1 Fig). These data support previous work  
175 showing that *H. hammondi* cannot be subcultured with high efficiency after 7 days in culture (14,  
176 15), but identify a previously unknown window where this parasite can be effectively  
177 subcultured. These data also show that parasites emerging from lysed vacuoles at the later  
178 stages of incubation are impaired in their ability to re-invade host cells, a phenotype that is  
179 again highly distinct from *T. gondii*.

180

### 181 ***H. hammondi* zoites from early *in vitro* culture are infective to mice**

182 Numerous reports (2, 14, 15, 22) have demonstrated that *H. hammondi* grown *in vitro*  
183 cannot be used to infect another intermediate host, but our data in Fig 5 show that parasites can  
184 be subcultured during first 8 days post-excystation. Here, we aimed to determine if *H.*  
185 *hammondi* cultivated for a short time *in vitro* could also be used to infect mice. HhCatAmer or  
186 HhCatEth1 sporulated oocysts were excysted and grown in HFFs for 4 days, at which time  
187 monolayers were scraped, syringe lysed, and filtered. We infected mice intraperitoneally with  
188 50,000 zoites of either HhCatAmer (4 mice) or HhCatEth1 (1 mouse) and harvested spleens,  
189 peritoneal lavage fluid, and cells (PECs) on 4 (3 mice) or 9 (2 mice) DPI. All 5 spleen samples  
190 and 1 PEC sample had detectable *H. hammondi* DNA based on PCR using *H. hammondi*



191 specific primers (Fig 6A), showing that early cultures of *H. hammondi* maintained mouse  
192 infectivity.

193 To determine if *in vitro* cultivated *H. hammondi* could initiate chronic infections in mice,  
194 we injected 5 Balb/c mice intraperitoneally with ~50,000 day 5 zoites. Serum collected on days  
195 2 and 3 post-infection had detectable IFN $\gamma$ , indicative of active infection (Fig 6B). At 3 weeks  
196 post-infection *H. hammondi* DNA was detected in both the spleen and peritoneal cell  
197 preparations from both mice (Fig 6C). Histological examination of muscle from infected mice  
198 using anti-*Toxoplasma* antibodies that cross-react with *H. hammondi* showed the presence of  
199 the parasites in the muscle tissue of the mouse infected with *in vitro*-passed *H. hammondi* (right  
200 panel, Fig 6D). These tissue-dwelling parasites were similar to those observed after oral  
201 inoculation with *H. hammondi* sporulated oocysts (middle panel; Fig 6D). Overall these data  
202 show that *H. hammondi* parasites grown *in vitro* are capable of a) inducing an immune response  
203 in mice during the acute phase of infection, and b) disseminating to multiple mouse tissues and  
204 establishing a chronic infection that resembles an infection resulting from oral gavage with  
205 sporulated oocysts (as shown in previous studies; (2, 15)).

206 After finding that *H. hammondi* zoites could infect mice after 4-5 days in culture, we  
207 aimed to determine if this ability changed over time. Mice were injected intraperitoneally with  
208 50,000 zoites (released by needle passage) grown *in vitro* for 6, 8, 10, 13, and 15 days, and  
209 monitored for signs of infection by analyzing IFN $\gamma$  levels in serum samples taken daily following  
210 infection. Remarkably, the ability to be subcultured *in vitro* tracked perfectly with the ability to  
211 initiate infections in mice *in vivo*. We observed an increase in IFN $\gamma$  levels (indicative of infection)  
212 in 1 of 2 mice infected with 50,000 Day 6 zoites, and observed this spike in 2 of 2 mice infected  
213 with 50,000 Day 8 zoites. We did not see an increase in IFN $\gamma$  levels in mice infected on with  
214 parasites cultured for 10, 13, and 15 days, suggesting that after 8 days of *in vitro* culture *H.*  
215 *hammondi* is no longer infectious to mice, at least to a degree that results in induction of  
216 detectable serum IFN $\gamma$  levels (Fig 6E).

217

218 ***H. hammondi* parasites can be transfected using electroporation and grown *in***  
219 ***vitro*.**

220 Genetic manipulation of *H. hammondi* has not been reported in the literature. Given the  
221 genetic similarity between *T. gondii* and *H. hammondi* (11, 12), and the apparent  
222 interchangeability of promoter sequences between them (11, 23), we transfected ~4 million  
223 HhCatAmer sporozoites with a UPRT-targeting CRISPR/CAS9-GFP plasmid along with a  
224 PCR2.1 Topo-cloned *dsRED* cassette with 20 bp sequences flanking the CAS9 nuclease cut  
225 site within the *H. hammondi* UPRT gene. We used the *Toxoplasma*-specific plasmid to target *H.*  
226 *hammondi* UPRT as the gRNA sequence is identical between *T.gondii* and *H. hammondi*. As  
227 shown in Figure 7A, both of the plasmids were taken up and expressed by *H. hammondi*, as  
228 evidenced by GFP-fluorescence in the parasite nuclei and red fluorescence in the cytoplasm  
229 (Fig 7A). Importantly, transgenic parasites replicated *in vitro* as evidenced by the presence of  
230 multicellular vacuoles in the infected monolayer (Fig 7A). Transfection efficiency of viable  
231 parasites (as evidenced by those replicating *in vitro* with CAS9-GFP and/or dsRED staining)  
232 was ~4% (15 out of 350 vacuoles at 48 h post-transfection), which is consistent with typical  
233 transfection efficiencies observed with most strains of *T. gondii*. We reasoned that this system  
234 could be used to make a stable transgenic line of *H. hammondi*.

235

236 **Using *T. gondii* genetic tools to create a stable transgenic *H. hammondi* line.**

237 After transfection of ~4 million parasites with the Hhuprt:dsRED repair cassette and the  
238 gRNAuprt:cas9:gfp plasmid, we cultured them in 10  $\mu$ M FUDR during days 2-5 post-  
239 transfection. After FACS sorting for dsRED-expressing zoites, we sorted ~12,000 parasites  
240 (~3% of the total parasite population; Fig 7B), and injected two female Balb/c mice  
241 intraperitoneally with ~6000 dsRED-expressing zoites each. For the first week of the infection,

242 mice were injected 1X daily with 200  $\mu$ L of 1 mM FUDR, and both mice were euthanized and fed  
243 to a cat 4 weeks post-infection. Fecal floats showed the presence of dsRED-expressing  
244 sporozoites within some of the oocysts (Fig 7B), and ~32% of isolated sporozoites expressed  
245 dsRED based on FACS analysis (Fig 7B, bottom FACS plot). PCR screening (S2 Fig) and the  
246 inability to grow parasites long term *in vitro* confirmed the identity of the fluorescent parasites as  
247 *H. hammondia*.

248 To determine if our transgenic approach to disrupt the *UPRT* gene and insert a dsRED  
249 expression cassette was successful, we quantified the growth of dsRED<sup>+</sup> and dsRED<sup>-</sup> parasites  
250 in the presence of FUDR and compared it to wild type HhCatAmer. Fixed and permeabilized  
251 parasites were stained with cross-reactive anti-*Toxoplasma* antibodies to identify all vacuoles.  
252 After 4 days of growth, we quantified vacuole size and dsRED-expression status in >100  
253 vacuoles for each strain (WT and dsRED) and condition (Vehicle or 20  $\mu$ M FUDR). As expected,  
254 HhCatAmer:WT grew poorly in FUDR (Fig 7C), while HhCatAmer:dsRED parasites grew  
255 similarly to untreated parasites (Fig 7C). When we separated parasite growth in FUDR based on  
256 dsRED expression, we found that dsRED<sup>-</sup> parasites in the *H. hammondia* dsRED population  
257 were just as susceptible to FUDR as were HhCatAmer:WT parasites (Fig 7D, first 4 bars), while  
258 dsRED<sup>+</sup> parasites grew equally well in FUDR compared to Vehicle (Fig 7D, right 2 bars). These  
259 data suggest that most, if not all, of the dsRED-expressing parasites are also null for the *UPRT*  
260 gene, either by direct replacement of the *UPRT* gene with the dsRED cassette or by incorrect  
261 non-homologous end joining and insertion of the dsRED cassette at another genomic location.  
262 This represents the first stably transgenic *H. hammondia* line.

263

264 **The *H. hammondia* transcriptome is enriched for bradyzoite-specific genes and**  
265 **genes expressed only in *T. gondii* cat enteroepithelial stages.**

266 Using existing genome annotations, we identified 7372 genes that were informatically

267 determined to be syntenic orthologs between *T. gondii* and *H. hammondi* (ToxoDB.org). This is  
268 likely a conservative estimate of shared gene content between *T. gondii* and *H. hammondi* (12),  
269 but we used this dataset as a starting point for our transcriptional comparisons. The raw number  
270 of read counts mapping to coding sequences and overall transcript coverage from both the *T.*  
271 *gondii* and *H. hammondi* assemblies are shown in Figure 8A. As expected based on their  
272 dramatically different growth rates *in vitro* (Figs. 1 and 2), the number of cDNA reads mapping  
273 to *H. hammondi* coding sequences was lower overall compared to those mapping to *T. gondii*,  
274 and this was particularly pronounced at the 15 DPI. We addressed this issue by including genes  
275 in downstream analyses only if one *H. hammondi* D4 and one *H. hammondi* D15 sample had at  
276 least 5 reads. This reduced the overall size of the queried gene set to 4146, and all analyses  
277 were performed with this subset.

278         When  $\log_2$  transformed and DESeq2-normalized RPM (mapping Reads Per Million; all  
279 data in Table S1) values were plotted for Day 4 and Day 15 between species we observed a  
280 high correlation in transcript levels at both time points (Fig 8B), similar to our previous results  
281 with sporulated oocysts (23), with a clear subset of genes with differential expression (blue data  
282 points, Fig 8B). The majority of genes were expressed at similar levels between *T. gondii* and *H.*  
283 *hammondi* (hierarchically clustered heat map shown in S3A Fig), although subclusters of  
284 transcripts of different abundance are clearly present (annotated with lines and labels in S3A  
285 Fig). We used Gene Set Enrichment Analysis (GSEA; (24)), a set of previously published (25)  
286 gene sets, and supplemented them with our own gene sets to compare Day 4 and Day 15 *T.*  
287 *gondii* and *H. hammondi* transcriptional profiles (see Methods and Table 2 for Gene Sets).

288 **Table 2: Supplemental gene sets used in Gene Set Enrichment analyses.**

| Gene Set Name              | Search Strategy on ToxoDB                                                                                       | Size |
|----------------------------|-----------------------------------------------------------------------------------------------------------------|------|
| SRS_Family                 | Text search for "SAG-related sequence SRS"                                                                      | 111  |
| AP2_family                 | Text search for "AP2 domain transcription factor"                                                               | 66   |
| <i>In vivo</i> bradyzoite  | Chronic infection D28 p.i. at least 2 fold higher than<br>Acute infection D10 p.i.; Adjusted P-value $\leq$ 0.1 | 421  |
| <i>In vitro</i> bradyzoite | <i>T. gondii</i> strain M4 microarray data; 8 day <i>in vitro</i>                                               | 411  |

|                                                     |                                                                                                                          |     |
|-----------------------------------------------------|--------------------------------------------------------------------------------------------------------------------------|-----|
|                                                     | switch at least 2-fold greater than 2 day <i>in vitro</i> ;<br>protein coding only                                       |     |
| <b>CAT STAGE SPECIFIC 1</b>                         | Cat enteroepithelial stages at least 40-fold higher than Tachyzoite at D3, D5 or D7                                      | 293 |
| <b>CAT STAGE SPECIFIC 2</b>                         | Cat enteroepithelial stages >90th percentile in any of D3, D5 or D7; Tachyzoite expression between 0 and 50th percentile | 81  |
| <b><i>T. gondii</i> specific family genes (A-E)</b> | search for " <i>Toxoplasma</i> family * protein"                                                                         | 81  |

289

290           When comparing *T. gondii* and *H. hammondi* at each time point, we identified 7 gene  
 291 sets that showed significant enrichment among *H. hammondi*-high or *T. gondii*-high genes (Fig  
 292 8C). For *H. hammondi*, profiles showed significant enrichment for *in vitro* (D4, D15) and *in vivo*  
 293 (D15) bradyzoite gene sets (Fig 8C,D), among others. This is consistent with the spontaneous  
 294 bradyzoite differentiation phenotype characteristic of *H. hammondi* described above. Consistent  
 295 with *H. hammondi* spontaneous differentiation, *T. gondii* showed significant enrichment for the *in*  
 296 *vitro* tachyzoite gene set at day 15 p.i. (Fig 8C,D), a time point at which *H. hammondi* is over  
 297 50% dolichos-positive (Fig 3). We also assayed for gene sets that changed within each species  
 298 between the D4 and D15 time points (S3B Fig). For the most part, *T. gondii* and *H. hammondi*  
 299 shared a similar gene set enrichment profile at the D15 time point, sharing an enrichment for *in*  
 300 *vitro/in vivo* bradyzoite genes and the SRS\_family compared to D4 (S3B Fig).

301           A more unexpected finding was that at both day 4 and 15, *H. hammondi* had a  
 302 transcriptional profile with highly significant enrichment for genes that are uniquely expressed in  
 303 *T. gondii* cat enteroepithelial cells ((26, 27); e.g., merozoite-specific genes; CAT STAGE  
 304 SPECIFIC 1, 2; Fig 8C,D)). Specifically, out of 21 members of the "CAT STAGE SPECIFIC 1"  
 305 gene set that were detectable, 18 of them were ranked in the top 308/4146 (7.4%) and  
 306 174/4146 (4.2%) of *H. hammondi*-high genes at D4 and D15, respectively (Fig 8D). These data  
 307 suggest that *H. hammondi* has aspects to its transcriptional profile that are independent of its  
 308 spontaneous conversion to bradyzoites and that a subset of genes originally thought to be  
 309 restricted to merozoites may only be merozoite-specific in some species and not others.

310 Using DESeq2, we identified 344 genes of significantly different abundance between  
311 species at either the D4 or D15 time points, and 126 of these were found to be significant at  
312 both time points. We then focused on the enriched gene sets identified by GSEA (Fig 8C,D) and  
313 assessed the degree of overlap at each time point for significantly regulated genes from the *in*  
314 *vitro* bradyzoite, *in vitro* tachyzoite, and merozoite-specific gene sets (Fig 9A). While bradyzoite  
315 and *T. gondii* merozoite-specific transcripts were significantly higher in *H. hammondi* at D4 and  
316 D15 (Fig 9A-B,D), the bulk of the tachyzoite-specific genes found to be significantly higher in *T.*  
317 *gondii* compared to *H. hammondi* were restricted to the D15 time point (Fig 9A,C). This is  
318 consistent with the robust conversion to dolichos-positive bradyzoites in *H. hammondi*  
319 compared to the tachyzoite-like proliferation of *T. gondii* VEG.

320 One caveat with these data is that the number of reads mapping to the *H. hammondi*  
321 transcriptome was, on average, an order of magnitude lower than those that mapped to *T.*  
322 *gondii*. While this is most certainly due to the dramatic differences in replication rate between  
323 these species (Fig 2), we validated a subset of transcripts that were of greater abundance in *H.*  
324 *hammondi* using qPCR. To do this, we used *ROP18* as a positive control for a gene that was of  
325 significantly higher abundance in *H. hammondi* compared to *T. gondii* (TgVEG and other Type  
326 III strains express very little *ROP18* transcript; (11, 23, 28)), and *CDPK1* as a negative control  
327 for a gene of similar abundance between the two species (S4A Fig). *GRA1* transcript levels  
328 were used as loading controls. After validating primer sets (which had to be made separately for  
329 each species; see Table S2 for all primer sequences), we quantified 8 transcripts (plus *ROP18*)  
330 using qPCR on RNA freshly isolated from D4 and D15 HhCatEth1 and TgVEG cultures in HFFs.  
331 As expected *ROP18* was found to be >1000-fold greater in abundance in HhCatEth1 D4  
332 samples and >16-fold higher in D15 samples, while *CDPK1* transcript level was not significantly  
333 different between species at either time point (S4B Fig). The remaining 8 queried transcripts  
334 showed significantly higher abundance in *H. hammondi* compared to *T. gondii* at D4, and 2  
335 were found to also be of significantly higher abundance at the D15 time point (S4B Fig).

336 Therefore, we overall confirmed the increased transcription of a subset of queried genes  
337 between *T. gondii* and *H. hammondi* during *in vitro* culture, suggesting that our approach to  
338 identify transcripts of significantly higher abundance had a relatively low Type I error rate,  
339 despite the fact that there was such a large difference in the number of reads mapping to the *H.*  
340 *hammondi* transcriptome compared to *T. gondii* (Fig 8A).

341

## 342 Discussion

343 The ability to infect multiple hosts is a remarkable feature of many parasite species.  
344 Parasites with multi-host life cycles undergo stereotyped patterns of development and growth in  
345 a given host, reaching a unique developmental state in the life cycle that is transmissible to the  
346 next host. With very few exceptions, parasites with heteroxenous life cycles are obligately so;  
347 that is to say that life stages infectious to one host (e.g., the definitive host) are not infectious to  
348 another host (e.g., an intermediate host). Among the Sarcocystidae (including such parasites as  
349 *Sarcocystis spp.*, *Besnoitia spp.*, *Neospora spp.*), all have exogenous life cycles for which they  
350 are obligately heteroxenous with the exception of *T. gondii*. Only in *T. gondii* can oocysts and  
351 tissue cysts (i.e., bradyzoites) infect, and ultimately be transmitted by, both intermediate and  
352 definitive hosts. In addition to its comparatively flexible life cycle, *T. gondii* is more virulent in the  
353 mouse model than *H. hammondi* (for example, IFN $\gamma$ -knockout mice survive infection with *H.*  
354 *hammondi* while *T. gondii* is highly lethal in this host genetic background (2, 29)).

355 Given that the molecular determinants of life cycle and host range are poorly understood  
356 in most parasite species, we are exploiting the *T. gondii*/*H. hammondi* system as a way of  
357 understanding how complex life cycles evolve, are maintained, and can be altered. In the  
358 present study, we conducted comparisons between one strain of *T. gondii* (VEG strain) and 2  
359 strains of *H. hammondi* (HhCatEth1 and HhAmer), quantifying differences in excystation  
360 frequency, infectivity *in vitro* and *in vivo*, replication rate, and development. Ideally, one *H.*

361 *hammondi* strain would be used for all experiments, but two strains of *H. hammondi* were  
362 utilized due to oocyst availability at the time of experimentation. We identified dramatic  
363 differences in parasite biology between these two species that likely contribute to their  
364 differences in pathogenesis in the mouse model, and that may also be important in determining  
365 the host species in which this parasite can cause disease.

366 The nearly 2-fold difference in replication rate could play an important role in parasite  
367 virulence (Table 1, Fig 2D, E), assuming this phenotype is recapitulated *in vivo*. Besides the  
368 impact that a slower replication rate would have on acute virulence, it may also impact infection  
369 outcome in the chronic phase. While *H. hammondi* parasites can at times be detected in the  
370 brains of mice after infection with oocysts (2), this particular outcome that is a hallmark of *T.*  
371 *gondii* infection (2, 30) is much less common after exposure to *H. hammondi*. It is possible that  
372 *H. hammondi* is unable to cross the blood-brain barrier via infection of endothelial cells (31) or is  
373 poorly trafficked by dendritic cells and/or macrophages. However, a simple explanation for this  
374 difference in “tropism” could be driven solely by the comparatively lower parasite burden during  
375 *H. hammondi* infection in mice. In contrast to differences in replication rate, we observed no  
376 substantial differences in the ability of *T. gondii* and *H. hammondi* to invade and form vacuoles  
377 within HFFs, suggesting that their invasion machinery is mostly conserved and intact. This idea  
378 finds some support in our transcriptome data, where we detected no enrichment for gene sets  
379 consisting of microneme, rhoptry or dense granule genes, and detected similar amounts of  
380 crucial invasion genes like AMA1, SpAMA1, as well as multiple rhoptry neck proteins (see Table  
381 S1 for normalized RNAseq data).

382 One surprising finding was that we repeatedly harvested significantly higher sporozoite  
383 yields from *T. gondii* compared to *H. hammondi* (~2-fold overall; Fig 1A), and this was  
384 independent of oocyst age and the preparation of *H. hammondi* (Fig 1B). One caveat is that the  
385 same prep of TgVEG oocysts was used for all 10 extractions, so this observation could be due  
386 to differences in this parasite preparation. However, we recently excysted a separate, 4 month



387 old TgVEG oocyst preparation and obtained a ~13% sporozoite yield, suggesting that the ability  
388 to excyst may be a consistent difference between the species. While the excystation procedure  
389 is artificial, if *T. gondii* excysts more readily than *H. hammondi*, this could lead to higher infection  
390 efficiencies and ultimately more robust transmission. The comparative ease of excystation could  
391 also be related to the ability of *T. gondii* oocysts to excyst in both definitive and intermediate  
392 hosts. This might compromise environmental stability (due to a less robust oocyst or sporocyst  
393 wall), but the trade-off with respect to increased host range and transmission rates might be  
394 immense and highly favored. Experiments examining excystation rates within the animal itself  
395 and environmental stability will be necessary to address this question directly.

396         While others (15) have observed that *H. hammondi* grown in tissue culture for many  
397 weeks transformed into infectious cyst stages, the exact timing of this event was not known.  
398 Spontaneous cyst conversion after initiating cultures with *T. gondii* sporozoites have also been  
399 described, and in most detail for *T. gondii* strain VEG (13). In contrast to TgVEG, which showed  
400 varying rates of spontaneous conversion but continued to replicate throughout the experiment,  
401 *H. hammondi* (American strain) fully converted to a bradyzoite cyst-like stage by 23 days post  
402 infection (DPI). This programmed differentiation correlated with the ability of *H. hammondi* to  
403 infect new host cells *in vitro* and *in vivo*. Our results suggest that *H. hammondi* is capable of  
404 subculture for a limited, yet highly predictable window. This finding is in contrast to previous  
405 studies where subculture was unsuccessful (14, 15). However, in these studies, subculture of *H.*  
406 *hammondi* was attempted after 1, 2, 4, and 6 weeks of growth, and all but one of these time  
407 points are outside of the period which we described as the window of infectivity for *H.*  
408 *hammondi*. Furthermore, insufficient details regarding experimental approach to subculture and  
409 infection analysis could make it possible that infection occurred and was undetected, or that not  
410 enough parasites were used for subculture to allow for detection of parasites. This explanation  
411 is supported by the dramatic decline in the number of observable parasites near the end of our  
412 8 day window of subculture for *H. hammondi*. When taken together with the dynamics of

413 spontaneous differentiation in *H. hammondi*, these data demonstrate that *H. hammondi*  
414 terminally differentiates into a life stage that is no longer infectious to anything but the definitive  
415 host, including neighboring host cells. It's unknown whether terminally differentiated *H.*  
416 *hammondi* tissue cysts could be coaxed to infect cat gut epithelial cells *in vitro*. This would be a  
417 novel approach to determine the relative importance of host cells versus the host cell  
418 environment in determining life cycle restrictions. *T. gondii* does not appear to have a life stage  
419 that is analogous to the *H. hammondi* terminally differentiated tissue cyst. Both *in vivo*- and *in*  
420 *vitro*-generated *T. gondii* tissue cysts can recrudescence to the tachyzoite stage, leading to lethal  
421 disease in immunocompromised and organ transplant patients (32, 33). While it is not known if  
422 *H. hammondi* can infect humans, based on the data in hand, we predict that if human infections  
423 with *H. hammondi* did occur, tissue cysts would be unable to cause disease in  
424 immunosuppressed or immunocompromised patients due to a) low or non-existent  
425 recrudescence rates and/or b) inability of recrudescenced parasites to invade neighboring host  
426 cells. Further work in mouse reactivation models could help to address this question, in addition  
427 to the development of serological tests that could immunologically distinguish these two  
428 parasites.

429 *T. gondii* of nearly all genetic backgrounds can be induced to form tissue cysts *in vitro*  
430 through the application of a variety of stressors (pH, nitric oxide donors, serum starvation; (13,  
431 34, 35)), and conversion to tissue cysts in *T. gondii* facilitates effective transmission since the  
432 cyst wall aids in survival of the parasite as it passes through the stomach. Given the importance  
433 of the stress response in *T. gondii* replication and transmission dynamics, we were surprised to  
434 find that day 2 *H. hammondi* zoites exposed to high pH (8.2) medium for 2 days did not form  
435 any DBA-positive cysts. This suggests that *H. hammondi* may be less sensitive to external  
436 stressors than *T. gondii*, despite the fact that it ultimately converts to a 100% DBA-positive  
437 population. It is possible that being responsive to external stress facilitates a flexible *T. gondii*  
438 life cycle, enabling it to increase its population to the highest possible level (depending on the

439 immune response of the host) prior to converting to the tissue cyst stage. In the case of *H.*  
440 *hammondi*, the lack of stress-induced switching may reflect that *H. hammondi* is predictably  
441 moving towards terminal differentiation, and therefore is under no selective pressure to sense  
442 the host environment (or at least no pressure to respond to those changes by converting to a  
443 cyst). If the progression from replicating *H. hammondi* zoite to tissue cyst is as predictable *in*  
444 *vivo* as it is *in vitro*, timing is crucial for this strategy to be successful since it is thought that only  
445 bradyzoites are immune to the toxic host response. It may be that the timing of *H. hammondi*  
446 conversion is compatible with rodent immune responses (known intermediate hosts for *H.*  
447 *hammondi*; (14, 22, 36)), but may not be in other species. The *T. gondii*/*H. hammondi*  
448 comparative system provides a unique opportunity to address these questions more directly.

449         Some insight into the *H. hammondi* developmental process can be gleaned from the 4  
450 and 15 DPI transcriptional profiling data. *H. hammondi* consistently upregulated genes  
451 previously defined as being uniquely expressed in *T. gondii* bradyzoites (whether *in vivo* or *in*  
452 *vitro*) as early as 4 DPI, indicating that there is a high degree of similarity between the  
453 spontaneous differentiation process that occurs in *H. hammondi* and the stress-induced process  
454 observed in *T. gondii* (25, 37, 38). This observation is consistent with the emergence of DBA-  
455 positive *H. hammondi* vacuoles throughout the developmental process *in vitro*. Less expected,  
456 however, was the constitutive expression of genes in *H. hammondi* that are restricted to cat  
457 enteroepithelial stages in *T. gondii* (27). It is exciting to speculate that the expression of certain  
458 genes in *H. hammondi* bradyzoites that are merozoite-specific in *T. gondii* is related to the fact  
459 that *H. hammondi* bradyzoites are only infectious to cat cells. Future studies aimed at obtaining  
460 higher coverage transcriptomes will help to address this, as will the use of our newly developed  
461 transgenic system for *H. hammondi*.

462         In contrast to previously published work, we identified a short but very predictable  
463 replicative window during which *H. hammondi* could be used to infect new host cells (whether  
464 those cells were in an animal or a tissue culture dish). We exploited this time period to

465 genetically manipulate *H. hammondi* using gene editing strategies developed for *T. gondii*. (39)  
466 Using these strategies, along with our knowledge of the limits of *H. hammondi*'s *in vitro* growth,  
467 we generated the first transgenic *H. hammondi* parasites expressing dsRED (30-40% after the  
468 first round of selection) that were >99% resistant to FUDR. This work represents an important  
469 step in improving the genetic tractability of the *H. hammondi* system, paving the way for future  
470 studies targeting specific loci that may be implicated in the dramatic differences in the life  
471 cycles, lytic cycles, and virulence determinants of these closely-related parasite species.

472

## 473 **Materials and methods**

### 474 **Parasite strains and oocyst isolation**

475 Oocysts of *Hammondia hammondi* strain HhCatEth1 (18), HhCatAmer (22) and  
476 *Toxoplasma gondii* strain VEG (16) were isolated from experimentally infected cats as  
477 described previously (16). Briefly, wild type (for *T. gondii*) or interferon- $\gamma$  (IFN- $\gamma$ ) knockout (for *H.*  
478 *hammondi*) mice were orally infected with  $10^4$  sporulated oocysts and sacrificed 4-6 weeks post-  
479 infection, and leg muscle (for *H. hammondi*) or brain (*T. gondii*) tissue were fed to 10-20 week  
480 old specific pathogen-free cats. Feces were collected during days 7-11 post-infection, and  
481 unsporulated oocysts were isolated via sucrose flotation. Oocysts were placed at 4°C in 2%  
482 H<sub>2</sub>SO<sub>4</sub> to allow for sporulation to occur and for long-term storage.

483 Due to the limited availability and difficulty associated with the generation of oocysts, two  
484 strains (HhCatEth1 and HhCatAmer) of *H. hammondi* generated from multiple cat-derived  
485 oocysts preparations were used in experiments described below. Furthermore, various MOIs  
486 were utilized throughout the experiments described below to compensate for differences in  
487 replication between *T. gondii* and *H. hammondi*.

488

### 489 **Excystation of *T. gondii* and *H. hammondi* Oocysts**

490 Sporulated oocysts were washed 3X in Hanks' balanced salt solution (HBSS; Life  
491 Technologies, 14175145) and treated with 10% bleach in PBS for 30 minutes while shaking at  
492 room temperature. Washed pellets were resuspended in 3 mL of HBSS in a 15-mL falcon tube,  
493 and 4g sterile glass beads (710-1,180  $\mu$ M; Sigma-Aldrich, G1152) were added. Parasites were  
494 vortexed on high speed for 15 seconds on/15 seconds off, 4X. Supernatant was removed and  
495 pelleted by centrifugation. The pellet was resuspended and syringe-lysed using a 25 gauge  
496 needle in 5 mLs of pre-warmed (37°C) and freshly made, sterile-filtered excystation buffer (40  
497 mL PBS, 0.1 g Porcine Trypsin (Sigma-Aldrich, T4799), 2 g Taurocholic Acid (Sigma-Aldrich,  
498 T4009), pH 7.5). After 45 minutes in a 37°C water bath, the suspension was syringe lysed  
499 again, and 7 mLs of cDMEM (100U/mL penicillin, 100 $\mu$ g/mL streptomycin, 2mM L-glutamine,  
500 10% FBS, 3.7g NaH<sub>2</sub>CO<sub>3</sub>/L, pH 7.2) was added to quench the excystation media. Mixture was  
501 centrifuged, pellet resuspended in cDMEM, and passed onto monolayers of human foreskin  
502 fibroblasts (HFFs) grown at 37°C in 5% CO<sub>2</sub>.

503

#### 504 **Fixing parasites for immunofluorescence assays**

505 Parasites were washed twice with PBS, fixed with 4% paraformaldehyde in PBS  
506 (Affymetrix, 19943), washed twice with PBS, and blocked/permeabilized in blocking buffer  
507 (50mL PBS, 5% BSA, 0.1% Triton X-100).

508

#### 509 **Quantification of sporozoite viability and replication rate**

510 After 10 minutes incubation on HFFs at 37°C in 5% CO<sub>2</sub>, monolayers containing freshly  
511 excysted parasites were scraped, serially syringe lysed (25 and 27 gauge needles), and  
512 pelleted. The pelleted parasites were resuspended in cDMEM, filtered through a 5  $\mu$ M syringe-  
513 driven filter (Fisher Scientific, SLSV025LS) and used to infect 4-chambered slides (Lab-Tek® II,  
514 154526) containing a confluent monolayer of HFFs at an MOI of 0.5 for both *H. hammondi*

515 CatEth1 and *T. gondii* VEG. After 1, 2, and 3 days of growth, cells and parasites were fixed as  
516 described above and stored in blocking buffer at 4°C until needed. Cells were immunostained  
517 with goat polyclonal *Toxoplasma gondii* Antibody (ThermoFisher Scientific, PA1-7256) at 1:500.  
518 The secondary antibody, Alexa Fluor® 594 Donkey anti-Goat IgG (H+L) (ThermoFisher  
519 Scientific, A-11037) was used at 1:1000. Coverslips were mounted to 4-chambered slides using  
520 VECTASHIELD Antifade Mounting Medium with or without DAPI, depending on the application  
521 (Vector labs, H-1000).

522         Vacuole formation was used as a proxy for sporozoite invasive capacity. To quantify this,  
523 the number of vacuoles with at least 1 parasite was determined in 100 random FOVs (1000x  
524 magnification) for 3 technical replicates for each parasite species at 1, 2, and 3 DPI. The entire  
525 experiment was repeated twice with different cat-derived oocyst preparations. For replication  
526 rate quantification, images of parasite-containing vacuoles were taken with an Axiovert 100  
527 inverted fluorescent microscope with Zen lite 2012 software. The number of parasites per  
528 vacuole was determined for each image (biological replicates 1 & 2), and vacuole size  
529 (Biological replicate 1 only) was determined for each image using ImageJ software (NIH).

530

### 531 **Quantification of spontaneous *Dolichos biflorus*-positive cyst formation *in vitro***

532         For *Dolichos Biflorus* Agglutinin (DBA) staining, monolayers containing freshly excysted  
533 parasites were scraped, syringe lysed, and pelleted 24 hours after growth. The pellet was  
534 resuspended in cDMEM, filtered through a 5 µM syringe-driven filter (Fisher Scientific,  
535 SLSV025LS), and passed at MOIs of 0.3 (HhCatEth1) and 0.001 for (TgVEG) onto coverslips  
536 containing a confluent monolayer of HFFs. Three coverslips were infected per strain for each  
537 time point analyzed. At 4 and 15 DPI, cells and parasites were fixed as described above and  
538 stored in blocking buffer at 4°C until immunostaining was conducted.

539         In addition to being stained with rabbit *Toxoplasma gondii* Polyclonal Antibody  
540 (Invitrogen, PA1-7252) at a dilution of 1:500 and a 1:1000 dilution of Alexa Fluor® 594 goat anti-

541 rabbit IgG (H+L) (ThermoFisher Scientific, A-11037), coverslips were stained with Fluorescein  
542 labeled *Dolichos biflorus* Agglutinin (DBA; Vector Labs, FL-1031) at a dilution of 1:250.  
543 Coverslips were then mounted to microscope slides using ProLong® Diamond Antifade  
544 Mountant with DAPI (ThermoFisher Scientific, P36962).

545 The number of DBA positive vacuoles was quantified in 20 FOVs in 3 coverslips for each  
546 parasite at 4 and 15 DPI. Images were obtained with an Axiovert 100 inverted fluorescent  
547 microscope with Zen lite 2012 software and edited using ImageJ software (NIH).

548

#### 549 **Induction of bradyzoite formation in *T. gondii* and *H. hammondi***

550 Monolayers containing freshly excysted parasites were scraped, syringe lysed, and  
551 filtered through a 5 µM syringe-driven filter (Fisher Scientific, SLSV025LS) after 24 hours of  
552 growth. Filtered parasites were pelleted and passed at MOIs of 0.5 (*H. hammondi*) and 0.1 for  
553 (*T. gondii*) onto coverslips containing a monolayer of HFFs. Three coverslips were infected per  
554 parasite per treatment group. After 2 days, media was changed to pH 8.2 bradyzoite switch  
555 media (DMEM with 100U/mL penicillin, 100µg/mL streptomycin, 2mM L-glutamine 10mM  
556 HEPES, 2g/L NaHCO<sub>3</sub>, and 1% FBS (40)) or cDMEM. Coverslips with pH 8.2 media were grown  
557 at 37°C in the absence of CO<sub>2</sub>. Media was changed again at 3 DPI. After 4 DPI, cells and  
558 parasites were fixed as described above and stored in blocking buffer at 4°C until needed.  
559 Dolichos and counter-staining was conducted using Fluorescein labeled DBA and rabbit  
560 *Toxoplasma gondii* Polyclonal Antibody as described above. The number of DBA-positive  
561 vacuoles was quantified in 15 FOVs in 3 coverslips for each strain grown at either pH 7.2 or pH  
562 8.2 and the percentage of DBA positive vacuoles was determined. Images were obtained and  
563 analyzed as described above.

564

#### 565 **Subculture of *H. hammondi***

566 Sporozoites were obtained using the excystation protocol described above with the  
567 exception of syringe lysis and previously described host cell incubation. Six confluent  
568 monolayers of HFFs grown in T-25's were infected with *H. hammondi* American (HhCatAmer)  
569 sporozoites at an MOI of ~2 (2.8 million sporozoites). After a three-hour incubation at 37°C, the  
570 Day 0 Transfer flask was scraped, syringed lysed 5X with 25 gauge needle, filtered through a 5  
571 µM syringe-driven filter (Fisher Scientific, SLSV025LS), and passed to a new confluent  
572 monolayer of HFFs grown in a T-25. This process was repeated after 2, 5, 8, 11, and 15 days  
573 post-excystation. After 3 days of growth following passage, 4.17cm<sup>2</sup> of the T-25 was monitored  
574 daily. Images of vacuoles were obtained with an Axiovert 100 inverted fluorescent microscope  
575 with Zen lite 2012 software with a 40X objective, and vacuole sizes were quantified using  
576 ImageJ software (NIH).

577

#### 578 **Characterizing limits of *in vivo* infectivity of *H. hammondi* grown *in vitro***

579 Sporozoites were obtained using the excystation protocol described above. After 24  
580 hours, HFF monolayers infected with excysted sporozoites were scraped, syringe lysed 5X with  
581 a 25 gauge needle, and pelleted. The pellet was resuspended in cDMEM, filtered through a  
582 5µM syringe-driven filter (Fisher Scientific, SLSV025LS) and passed onto confluent monolayers  
583 of HFFs grown in T-25s. Infected host cells were incubated at 37 °C 5% CO<sub>2</sub> from 6, 8, 10, 13,  
584 and 15 days. The media was replenished after 5-7 days. At each time point, infected host cells  
585 were scraped, syringe lysed 3X with a 25 gauge needle and 3X with a 27 gauge needle, and  
586 pelleted. Parasites were counted and diluted in PBS, and a dose of 50,000 parasites was  
587 injected intraperitoneally in 2 BALB/C mice for each time point. Serum samples were obtained  
588 from infected mice daily for 9 days post-infection and the mass of the mice was also monitored  
589 daily. After 9 days of infection, the mice were sacrificed and dissected. Tissue samples were  
590 preserved in 10% neutral buffered formalin (Sigma HT501128) until immunohistochemistry  
591 analysis was performed.



592

### 593 **Tissue sectioning and staining**

594 Fixed tissue samples were embedded in paraffin, sectioned, and stained using rabbit  
595 anti-*Toxoplasma* antibody (ThermoScientific Cat# RB-9423-R7) by Research Histology Services  
596 at the University of Pittsburgh. For antigen retrieval, deparaffinized slides were steamed at  
597 pH=6.0 in 10 mM Citrate buffer. After exposure to 3% H<sub>2</sub>O<sub>2</sub>, slides were washed in Tris-buffered  
598 saline with 2.5% Tween-20 (TBST), and blocked for 20 min each with Avidin and Biotin blocking  
599 reagents (Vector labs; SP-2001) with TBST washes in between. Slides were blocked in 0.25%  
600 casein PBS for 15 min, and incubated overnight in primary antibody (1:100 dilution in 3% goat  
601 serum in PBS). Slides were washed in PBST and incubated for 30 minutes with biotinylated  
602 goat anti-rabbit (Vector laboratories; BA-1000; 1:200 dilution in 3% goat serum in PBS).  
603 Following 3 washes with PBST, slides were incubated for 30 minutes with streptavidin-HRP  
604 (Vector laboratories; PK-6100), washed 3X with PBST, and incubated with AEC substrate  
605 (Skytec; ACE-500/ACD-015) for 15 minutes. Following rinses in water, slides were  
606 counterstained with aqueous hematoxylin and blueed using Scott's tapwater substitute. Slides  
607 were mounted in Crystal Mount.

608

### 609 **Interferon-gamma (IFN- $\gamma$ ) ELISA**

610 Blood samples were obtained from mice daily via submandibular bleed, allowed to clot,  
611 and centrifuged at 100xg. Serum was stored at -20°C until ELISAs were performed. IFN- $\gamma$  levels  
612 were determined using the BD OptEIA™ Set Mouse IFN- $\gamma$  kit (Cat.# 555138) according to  
613 manufacturer's instructions. Serum samples were typically diluted 1:20.

614

### 615 **Transfection of *Hammondia* parasites and selection of recombinant parasites**

616 Excysted sporozoites were prepared as described above and incubated overnight in a

617 T25 flask with confluent monolayer of HFFs. After 24 hours, the monolayer was scraped,  
618 syringe lysed 3X with a 25 gauge and 27 gauge needle, and filtered using a 5  $\mu$ M syringe-driven  
619 filter (Fisher Scientific, SLSV025LS). The filtered contents were pelleted by centrifugation at 800  
620 x g for 10 min, and the pellet was resuspended in 450  $\mu$ l of cytomix with 2 mM ATP and 5 mM  
621 glutathione. Resuspended parasites were transferred to a cuvette, electroporated at 1.6 KV and  
622 a capacitance of 25  $\mu$ F, and used to infect confluent HFF monolayers on coverslips. The  
623 coverslips were fixed 5 DPI as described above and mounted using ProLong® Diamond  
624 Antifade Mountant with DAPI (ThermoFisher Scientific, P36962).

625 To create stable transgenic *H. hammondi* parasite lines, the CRISPR/CAS9 plasmid  
626 expressing a gRNA sequence targeting the uracil phosphoribosyl transferase locus (UPRT;  
627 (39); kindly provided by David Sibley, Washington University) and a repair template consisting  
628 of 20 bp UPRT-targeting sequences flanking a PCR-amplified a dsRED expression cassette  
629 driven by the *T. gondii* GRA1 promoter with a GRA2 3' UTR (amplified from the  
630 dsRED:LUC:BLEO plasmid described in (41, 42)) were used for transfection. Following  
631 centrifugation (800 x g, 10 min), 24 h *H. hammondi* zoites were resuspended in 450  $\mu$ l of  
632 cytomix with ATP and glutathione containing 20  $\mu$ g of the CRISPR/CAS9:*uprt*gRNA plasmid and  
633 20  $\mu$ g of PCR2.1 TOPO vector containing the dsRED repair template. The parasites were  
634 electroporated as above and each transfection contained at least 4 million parasites.  
635 Transfected parasites were then transferred to HFFs and grown for 2 days in cDMEM, then  
636 selected for 3 days by incubation in cDMEM containing 10  $\mu$ M FUDR (Fig 5B). Parasites were  
637 again scraped, syringe lysed and filtered, and dsRED-expressing parasites were collected in  
638 PBS using flow cytometry. Sorted parasites were injected intraperitoneally into 2 BALB/c mice.  
639 After 3 weeks of infection, mice were euthanized, skinned, and the intestines were removed  
640 before feeding to specific pathogen-free cats. The oocysts were collected and purified as  
641 described above, and oocysts, sporozoites and replicating parasites were evaluated for dsRED  
642 fluorescence using microscopy, flow cytometry and FUDR resistance.

643

## 644 **FUDR resistance of transgenic parasites**

645 To test for UPRT resistance in transgenic *H. hammondi*, sporozoites of wild type and  
646 dsRED-expressing parasites were incubated overnight in a T25 flask with confluent monolayer  
647 of HFFs. After 24 hours, parasites were isolated by needle passage and filtration as above. We  
648 infected coverslips containing confluent HFFs with 50,000 parasites, and parasites were  
649 exposed to media alone or media containing or 20  $\mu$ M FUDR. The parasites were allowed to  
650 grow for 4 days and then fixed using 4%PFA for 20 minutes. After blocking overnight in  
651 PBS/BSA/triton, coverslips were stained with rabbit anti-*Toxoplasma* antibody at a 1:500 dilution  
652 for an hour, and stained with Alexa-fluor 488-labeled goat anti Rabbit antibody. For each  
653 treatment/strain combination, we counted the number of parasites in at least 100 vacuoles, and  
654 for HhdsRED parasites we also quantified growth in both red and wild type vacuoles (since the  
655 HhdsRED parasites were from a mixed population).

656

## 657 **RNA sequencing and data processing**

658 Sporozoites were isolated from HhCatEth1 and TgVEG sporulated oocysts as described  
659 above and used to directly infect confluent HFF monolayers in 96 well tissue culture plates with  
660 MOIs of 3, 1 or 0.5 purified sporozoites for each species. On day 4 post-infection, wells were  
661 observed and chosen for RNA analysis based on similar numbers of parasite-containing  
662 vacuoles lack of significant host cell lysis in both species. For the Day 4 samples, the MOI=3  
663 infected wells were chosen for *H. hammondi*, while the MOI=0.5-infected wells were chosen for  
664 *T. gondii*. Wells were washed 3X with ~200  $\mu$ L cDMEM, and RNA was harvested using Trizol  
665 (Invitrogen). Remaining *H. hammondi* wells were washed with 3X with cDMEM on Day 4 and  
666 then again on Day 9 prior to harvest on Day 15 post-infection. For *T. gondii*, remaining MOI=3  
667 and 1-infected wells were scraped and syringe lysed on Day 4 and Day 9 and used to infect

668 new monolayers in 96 well plates at an MOI of either 0.5 (Day 4) or 0.3 (Day 9). On Day 15,  
669 wells for both *H. hammondi* (not subcultured) and *T. gondii* (subcultured 2x) were washed 1X  
670 with cDMEM and then harvested for RNAseq analysis. Two samples were harvested for each  
671 species on Day 4, and 3 samples were harvested from each species on Day 15. Total RNA  
672 samples were processed for Illumina next generation sequencing using the Mobioo strand-  
673 specific RNAseq library construction kit. Samples were analysed on an Illumina Nextseq and  
674 demultiplexed using NextSeq System Suite software. Reads were aligned to their respective  
675 species genome assembly (*H. hammondi* v10 or *T. gondii* strain ME49 v10; toxodb.org; (12))  
676 using the Subread package for Linux (v. 1.4.6; (43)) with subread-align using default parameters  
677 except for `-u` to keep only uniquely mapping reads. featureCounts from the subread package  
678 (43) was used to quantify the number of mapping reads per transcript, using default settings  
679 except for `-s 2` (for stranded read mapping), `-t CDS`, `-g Parent` (for specific compatibility with  
680 the *T. gondii* and *H. hammondi* gff files), `-Q 10` (minimum mapping quality required). The `-t`  
681 CDS option was chosen for both *T. gondii* and *H. hammondi* because to date no 5' or 3' UTR  
682 sequences have been predicted for *H. hammondi* (in contrast to *T. gondii*). Fastq files have  
683 been deposited in the NCBI short read archive (Accession Numbers Pending).

684

## 685 **Identification of differentially expressed genes using DESeq2 and gene set** 686 **enrichment analysis**

687 Raw count data per transcript (generated by featureCounts above) were loaded into R  
688 statistical software and analyzed using the DESeq2 package (44). Comparisons of D4 and D15  
689 read count data were used to identify transcripts of different abundance at each time point, and  
690 differences were deemed significant at  $P_{\text{adj}} < 0.05$ . Data were  $\log_2$  transformed and normalized  
691 using the `rlog` function in DESeq2 for use in downstream analyses.  $\log_2$  transformed,  
692 normalized data from DESeq2 (hereafter referred to as  $\log_2$  (FPM)) were analyzed for

693 enrichment using Gene Set Enrichment Analysis (GSEA; (24)). Since read count overall from  
694 the *T. gondii* libraries were much greater than those from the *H. hammondi* libraries, we took the  
695 7372 genes matched based on the previously published gene-by-gene annotation (12) and  
696 selected only those that had at least 1 day 4 sample and 1 day 15 sample with >5 reads. In  
697 total, 4146 genes passed these benchmarks and were used in subsequent analyses. We used  
698 this approach to identify gene sets that were significantly different between days 4 and day 15 in  
699 culture in both species and those that were different between species at both day 4 and day 15.  
700 We compared these data using previously curated gene sets (434 total; as published in (25)) as  
701 well as 7 additional gene sets that we curated ourselves. These are listed in Table 2. All  
702 enrichment profiles were deemed significant if the FDR q-value was  $\leq 0.05$ .

703

#### 704 **cDNA synthesis and qPCR**

705 For qPCR validation of RNAseq data, after 24 hours of growth, monolayers containing  
706 excysted sporozoites were scraped, syringe lysed, and pelleted. The pellet was resuspended in  
707 cDMEM, filtered through a 5  $\mu$ M syringe-driven filter (Fisher Scientific, SLSV025LS) and passed  
708 at MOIs of 1 (*T. gondii*) and 7 (*H. hammondi*) into 96-well plates containing HFF monolayers.  
709 Mock-infected controls consisted of filtering parasites through a .22  $\mu$ M syringe-driven filter  
710 (Fisher Scientific, SLGL0250S). Three replicates were made for each sample per isolation time  
711 point. RNA was collected at day 4 and day 15 post-infection, (equivalent to day 5 and day 16  
712 post-excystation) from parasites and mock infections grown in 96-well plates. RNA was  
713 collected using the RNeasy Kit according to the manufacturer (Qiagen, 74104) using

714 QiaShredder spin columns (Qiagen, 79654) to homogenize samples, and RNase-free DNase to  
715 degrade contaminating DNA (Qiagen, 79254). Isolated RNA was ethanol precipitated,  
716 resuspended in 10  $\mu$ l RNase-free water, and these preparations were used to create cDNA  
717 using Superscript III Reverse Transcriptase Kit using Oligo(dT) primers according to the  
718 manufacturer (ThermoFisher Scientific, 18080051). All RNA samples were kept at  $-80^{\circ}\text{C}$ , and all  
719 cDNA reactions were kept at  $-20^{\circ}\text{C}$ . Prior to qPCR use, cDNA was diluted 1:10 with  $\text{H}_2\text{O}$ .

720 qPCR assays were performed on a QuantStudio 3 Real-Time PCR System in a 10  $\mu$ l  
721 reaction volume containing 5  $\mu$ l 2x SYBR Green Master Mix (VWR International, 95030-216), 3  
722  $\mu$ l of cDNA template, 1  $\mu$ l  $\text{H}_2\text{O}$ , and 1  $\mu$ l 5  $\mu\text{M}$  primer. Controls included a reverse transcription  
723 negative control and a water-template control. The thermal cycling protocol was  $95^{\circ}\text{C}$ , 10 min;  
724 40 cycles of ( $95^{\circ}\text{C}$ , 15s;  $60^{\circ}\text{C}$ , 1 min);  $4^{\circ}\text{C}$  hold. The melt curve protocol was  $95^{\circ}\text{C}$ , 15 s;  $60^{\circ}\text{C}$  1  
725 min,  $95^{\circ}\text{C}$  15 s. The control gene was dense granule 1 (GRA1), and samples were tested in  
726 duplicate or triplicate. Melt curves were performed on each plate (with the exception of 2 plates).  
727 Data were analyzed using the  $2^{-\Delta\Delta\text{Ct}}$  method (45), and statistical analyses were conducted on the  
728  $\Delta\text{Ct}$  values (as in (46)).

729

### 730 **Animal statement**

731 All mouse experiments were performed with 4- to 8-wk-old BALB/C and C57BL/6J mice. Animal  
732 procedures met the standards of the American Veterinary Association and were approved  
733 locally under Institutional Animal Care and Use Committee protocol no. 12010130.

734

### 735 **Acknowledgements**

736 The authors would like to thank Clara Stuligross for a critical reading of the manuscript. At the  
737 University of Pittsburgh, Cori Richards-Zawacki, Stephanie Ander, and Carolyn Coyne shared

738 expertise, reagents, and equipment required for qPCR. This work was supported by  
739 R01AI116855 and R01AI114655 to J.P.B.

740

741 The authors declare no conflicts of interest.

742

## 743 **References**

- 744 1. Dubey JP, Beattie CP. Toxoplasmosis of animals and man. . Boca Raton: CRC Press,  
745 Inc.; 1988.
- 746 2. Dubey JP, Sreekumar C. Redescription of *Hammondia hammondi* and its differentiation  
747 from *Toxoplasma gondii*. Int J Parasitol. 2003;33(13):1437-53.
- 748 3. Pappas G, Roussos N, Falagas ME. Toxoplasmosis snapshots: global status of  
749 *Toxoplasma gondii* seroprevalence and implications for pregnancy and congenital  
750 toxoplasmosis. Int J Parasitol. 2009;39(12):1385-94.
- 751 4. Jones JL, Kruszon-Moran D, Wilson M, McQuillan G, Navin T, McAuley JB. *Toxoplasma*  
752 *gondii* infection in the United States: seroprevalence and risk factors. Am J Epidemiol.  
753 2001;154(4):357-65.
- 754 5. Luft BJ, Hafner R, Korzun AH, Leport C, Antoniskis D, Bosler EM, et al. Toxoplasmic  
755 encephalitis in patients with the acquired immunodeficiency syndrome. Members of the ACTG  
756 077p/ANRS 009 Study Team. N Engl J Med. 1993;329(14):995-1000.
- 757 6. Remington JS, Klein JO. Infectious diseases of the fetus and newborn infant. 5th ed.  
758 Philadelphia: Saunders; 2001. xiv, 1507 p. p.
- 759 7. Carne B, Bissuel F, Ajzenberg D, Bouyne R, Aznar C, Demar M, et al. Severe acquired  
760 toxoplasmosis in immunocompetent adult patients in French Guiana. J Clin Microbiol.  
761 2002;40(11):4037-44.
- 762 8. Grigg ME, Ganatra J, Boothroyd JC, Margolis TP. Unusual abundance of atypical strains

- 763 associated with human ocular toxoplasmosis. J Infect Dis. 2001;184(5):633-9.
- 764 9. Marty P, Bongain A, Loiseau S, Benoit B, Chevallier A, Gillet JY, et al. Lethal congenital  
765 toxoplasmosis resulting from reactivation of toxoplasmosis in a pregnant HIV-positive patient.  
766 Presse Med. 2002;31(33):1558.
- 767 10. Takashima Y, Suzuki K, Xuan X, Nishikawa Y, Unno A, Kitoh K. Detection of the initial  
768 site of *Toxoplasma gondii* reactivation in brain tissue. Int J Parasitol. 2008;38(5):601-7.
- 769 11. Walzer KA, Adomako-Ankomah Y, Dam RA, Herrmann DC, Schares G, Dubey JP, et al.  
770 *Hammondia hammondi*, an avirulent relative of *Toxoplasma gondii*, has functional orthologs of  
771 known *T. gondii* virulence genes. Proceedings of the National Academy of Sciences.  
772 2013;110(18):7446-51.
- 773 12. Lorenzi H, Khan A, Behnke MS, Namasivayam S, Swapna LS, Hadjithomas M, et al.  
774 Local admixture of amplified and diversified secreted pathogenesis determinants shapes mosaic  
775 *Toxoplasma gondii* genomes. Nature Communications. 2016;7:10147.
- 776 13. Jerome ME, Radke JR, Bohne W, Roos DS, White MW. *Toxoplasma gondii* bradyzoites  
777 form spontaneously during sporozoite- initiated development. Infect Immun. 1998;66(10):4838-  
778 44.
- 779 14. Sheffield HG, M. L. Melton, and F. A. Neva. Development of *Hammondia hammondi* in  
780 cell cultures. Proceedings of the Helminthological Society of Washington. 1976;43(2).
- 781 15. Riahi H, Darde ML, Bouteille B, Leboutet MJ, Pestre-Alexandre M. *Hammondia*  
782 *hammondi* cysts in cell cultures. J Parasitol. 1995;81(5):821-4.
- 783 16. Dubey JP. Oocyst shedding by cats fed isolated bradyzoites and comparison of  
784 infectivity of bradyzoites of the VEG strain *Toxoplasma gondii* to cats and mice. J Parasitol.  
785 2001;87(1):215-9.
- 786 17. Speer CA, Dubey JP, Blixt JA, Prokop K. Time lapse video microscopy and  
787 ultrastructure of penetrating sporozoites, types 1 and 2 parasitophorous vacuoles, and the  
788 transformation of sporozoites to tachyzoites of the VEG strain of *Toxoplasma gondii*. J Parasitol.



- 789 1997;83(4):565-74.
- 790 18. Dubey JP, Tilahun G, Boyle JP, Schares G, Verma SK, Ferreira LR, et al. Molecular and  
791 Biological Characterization of First Isolates of *Hammondia hammondi* from Cats from Ethiopia.  
792 Journal of Parasitology. 2013;99(4):614-8.
- 793 19. Tilley M, Fichera ME, Jerome ME, Roos DS, White MW. *Toxoplasma gondii* sporozoites  
794 form a transient parasitophorous vacuole that is impermeable and contains only a subset of  
795 dense-granule proteins. Infect Immun. 1997;65(11):4598-605.
- 796 20. Speer CA, M. Tilley, M. E. Temple, J. A. Blixt, J. P. Dubey, M. W. White. Sporozoites of  
797 *Toxoplasma gondii* lack dense granule protein GRA3 and form a unique parasitophorous  
798 vacuole. Molecular and Biochemical Parasitology. 1995;75:75-86.
- 799 21. Bohne W, Heesemann J, Gross U. Reduced replication of *Toxoplasma gondii* is  
800 necessary for induction of bradyzoite-specific antigens: a possible role for nitric oxide in  
801 triggering stage conversion. Infect Immun. 1994;62(5):1761-7.
- 802 22. Frenkel JK, Dubey JP. *Hammondia hammondi* gen. nov., sp. nov., from domestic cats, a  
803 new coccidian related to *Toxoplasma* and *Sarcocystis*. Z Parasitenkd. 1975;46(1):3-12.
- 804 23. Walzer KA, Wier GM, Dam RA, Srinivasan AR, Borges AL, English ED, et al.  
805 *Hammondia hammondi* Harbors Functional Orthologs of the Host-Modulating Effectors GRA15  
806 and ROP16 but Is Distinguished from *Toxoplasma gondii* by a Unique Transcriptional Profile.  
807 Eukaryotic Cell. 2014;13(12):1507-18.
- 808 24. Subramanian A, Tamayo P, Mootha VK, Mukherjee S, Ebert BL, Gillette MA, et al. Gene  
809 set enrichment analysis: a knowledge-based approach for interpreting genome-wide expression  
810 profiles. Proc Natl Acad Sci U S A. 2005;102(43):15545-50.
- 811 25. Croken MM, Qiu W, White MW, Kim K. Gene Set Enrichment Analysis (GSEA) of  
812 *Toxoplasma gondii* expression datasets links cell cycle progression and the bradyzoite  
813 developmental program. BMC Genomics. 2014;15:515.
- 814 26. Behnke MS, Zhang TP, Dubey JP, Sibley LD. *Toxoplasma gondii* merozoite gene

- 815 expression analysis with comparison to the life cycle discloses a unique expression state during  
816 enteric development. BMC Genomics. 2014;15:350.
- 817 27. Hehl AB, Basso WU, Lippuner C, Ramakrishnan C, Okoniewski M, Walker RA, et al.  
818 Asexual expansion of *Toxoplasma gondii* merozoites is distinct from tachyzoites and entails  
819 expression of non-overlapping gene families to attach, invade, and replicate within feline  
820 enterocytes. BMC Genomics. 2015;16:66.
- 821 28. Boyle JP, Saeij JP, Harada SY, Ajioka JW, Boothroyd JC. Expression quantitative trait  
822 locus mapping of *Toxoplasma* genes reveals multiple mechanisms for strain-specific differences  
823 in gene expression. Eukaryot Cell. 2008;7(8):1403-14.
- 824 29. Scharton-Kersten TM, Wynn TA, Denkers EY, Bala S, Grunvald E, Hieny S, et al. In the  
825 absence of endogenous IFN-gamma, mice develop unimpaired IL-12 responses to *Toxoplasma*  
826 *gondii* while failing to control acute infection. J Immunol. 1996;157(9):4045-54.
- 827 30. Cabral CM, Tuladhar S, Dietrich HK, Nguyen E, MacDonald WR, Trivedi T, et al.  
828 Neurons are the Primary Target Cell for the Brain-Tropic Intracellular Parasite *Toxoplasma*  
829 *gondii*. PLOS Pathogens. 2016;12(2):e1005447.
- 830 31. Konradt C, Ueno N, Christian DA, Delong JH, Pritchard GH, Herz J, et al. Endothelial  
831 cells are a replicative niche for entry of *Toxoplasma gondii* to the central nervous system. Nat  
832 Microbiol. 2016;1:16001.
- 833 32. Barcan LA, Dallurzo ML, Clara LO, Valledor A, Macias S, Zorkin E, et al. *Toxoplasma*  
834 *gondii* pneumonia in liver transplantation: survival after a severe case of reactivation. Transpl  
835 Infect Dis. 2002;4(2):93-6.
- 836 33. Bosch-Driessen LH, Plaisier MB, Stilma JS, Van der Lelij A, Rothova A. Reactivations of  
837 ocular toxoplasmosis after cataract extraction. Ophthalmology. 2002;109(1):41-5.
- 838 34. Buchholz KR, Bowyer PW, Boothroyd JC. Bradyzoite pseudokinase 1 is crucial for  
839 efficient oral infectivity of the *Toxoplasma gondii* tissue cyst. Eukaryotic Cell. 2013;12(3):399-  
840 410.

- 841 35. Eaton MS, Weiss LM, Kim K, Department of Medicine AECOMB NY USA. Cyclic  
842 nucleotide kinases and tachyzoite-bradyzoite transition in *Toxoplasma gondii*. Int J Parasitol.  
843 2006;36(1):107-14.
- 844 36. Mason RW. The detection of *Hammondia hammondi* in Australia and the identification of  
845 a free-living intermediate host. Z Parasitenkd. 1978;57(2):101-6.
- 846 37. Tobin C, Pollard A, Knoll L. *Toxoplasma gondii* cyst wall formation in activated bone  
847 marrow-derived macrophages and bradyzoite conditions. Journal of visualized experiments :  
848 JoVE. 2010(42).
- 849 38. Pittman KJ, Aliota MT, Knoll LJ. Dual transcriptional profiling of mice and *Toxoplasma*  
850 *gondii* during acute and chronic infection. BMC Genomics. 2014;15:806.
- 851 39. Shen B, Brown KM, Lee TD, Sibley LD. Efficient Gene Disruption in Diverse Strains of  
852 *Toxoplasma gondii* Using CRISPR/CAS9. MBio. 2014;5(3).
- 853 40. Naguleswaran A, Elias EV, McClintick J, Edenberg HJ, Sullivan WJ, Jr. *Toxoplasma*  
854 *gondii* lysine acetyltransferase GCN5-A functions in the cellular response to alkaline stress and  
855 expression of cyst genes. PLoS Pathog. 2010;6(12):e1001232.
- 856 41. Jeffers V, Kamau ET, Srinivasan AR, Harper J, Sankaran P, Post SE, et al. TgPRELID,  
857 a Mitochondrial Protein Linked to Multidrug Resistance in the Parasite *Toxoplasma gondii*.  
858 mSphere. 2017;2(1).
- 859 42. Kamau ET, Srinivasan AR, Brown MJ, Fair MG, Caraher EJ, Boyle JP. A focused small-  
860 molecule screen identifies 14 compounds with distinct effects on *Toxoplasma gondii*.  
861 Antimicrobial agents and chemotherapy. 2012;56(11):5581-90.
- 862 43. Liao Y, Smyth GK, Shi W. The Subread aligner: fast, accurate and scalable read  
863 mapping by seed-and-vote. Nucleic Acids Res. 2013;41(10):e108.
- 864 44. Love MI, Huber W, Anders S. Moderated estimation of fold change and dispersion for  
865 RNA-seq data with DESeq2. Genome biology. 2014;15(12):550.
- 866 45. Livak KJ, Schmittgen TD. Analysis of Relative Gene Expression Data Using Real-Time

867 Quantitative PCR and the 2- $\Delta\Delta$ CT Method. Methods. 2001;25(4):402-8.

868 46. Boyle JP, Wu XJ, Shoemaker CB, Yoshino TP. Using RNA interference to manipulate  
869 endogenous gene expression in *Schistosoma mansoni* sporocysts. Mol Biochem Parasitol.  
870 2003;128(2):205-15.

871

## 872 **Figure Legends**

873 **Fig 1. *T. gondii* and *H. hammondi* maintain similar infection rates, but *T. gondii* excysts at**

874 **significantly higher rates.** A) The average sporozoite yield from an excystation of HhCatEth1

875 is significantly lower ( $5.0 \pm 1.2\%$ ) than the average yield of TgVEG sporozoites ( $11.6 \pm 2.1\%$ ).

876 Significance determined via unpaired T-test with Welch's correction,  $P=0.02$ . B) HhCatEth1 and

877 TgVEG sporozoite yields from oocyst preps of different ages. Sporozoite yield is not significantly

878 influenced by age of oocysts. Significance determined by linear regression: HhCatEth1  $P=0.76$ ,

879 TgVEG  $P=0.63$ . Each shape represents one yield from an independent biological prep. C)

880 There is no significant difference in sporozoite viability between HhCatEth1 and TgVEG. Graphs

881 demonstrate the *in vitro* percent viability (measured by the total number of vacuoles/vacuoles

882 expected) of HhCatEth1 and TgVEG sporozoites post excystation. Bars show the mean and SD

883 of two biological replicates (HhCatEth1  $0.1202 \pm 0.0243$ , TgVEG  $0.1035 \pm 0.0346$ ) and there was

884 no significance in viability between species, determined via unpaired T-test with Welch's

885 correction,  $P=0.6384$ .

886

887 **Fig 2. *H. hammondi* replicates at a decreased rate compared to *T. gondii*.** A) Confluent

888 monolayers of HFFs were infected with either HhCatEth1 or TgVEG sporozoites at an MOI of

889 0.5 and visualized over 3 days. While TgVEG sporozoites rapidly divided and produced large

890 vacuoles by 3 DPI, *H. hammondi* did not. B and C) Confluent monolayers of human foreskin

891 fibroblasts (HFFs) were infected with either HhCatEth1 or TgVEG sporozoites, obtained via *in*

892 *vitro* excystation at an MOI of 0.5. Infected monolayers were fixed at 1, 2, and 3 DPI and  
893 assayed for the number of parasites observed in each vacuole for infection with *T. gondii* and *H.*  
894 *hammondi* for a total of 2 replicates, Replicate 1 (B) and Replicate 2 (C). Vacuoles containing  
895 more than 16 parasites were binned at 16 as it was defined as the limit of confident detection.  
896 Bars represent mean  $\pm$  SD. For both Biological Replicate 1 & 2, there was a significant  
897 difference between the number of parasites per vacuole on Days 1, 2, & 3 PI for TgVEG. For  
898 Biological replicate 1, there was no significant difference between the number of parasites per  
899 vacuole for HhCatEth1 on Days 1, 2 & 3 PI. For Biological Replicate 2, there was a significant  
900 difference in the number of parasites per vacuole between 1 and 3 DPI for HhCatEth1.  
901 Statistical significance was determined with a 2-Way ANOVA and Tukey's multiple comparison  
902 test. D and E) Pie chart representing proportion of *T. gondii* and *H. hammondi* vacuoles  
903 containing different number of parasites after 1, 2, and 3 DPI for Replicate 1 (D) and Replicate 2  
904 (E). Vacuoles containing 16 or more vacuoles were donated as 16+.

905  
906 **Fig 3. *T. gondii* & *H. hammondi* spontaneously form tissue cysts *in vitro*, but do so with**  
907 **different dynamics.** A) Representative images of cells infected with *T. gondii* (TgVEG) and *H.*  
908 *hammondi* (HhCatEth1) sporozoites that were fixed and stained with DBA after 4 and 15 DPI.  
909 Scale bar represents 5 $\mu$ m. B) Quantification of *T. gondii* and *H. hammondi* infection described  
910 in A demonstrating that after 4 days, neither *H. hammondi* or *T. gondii* spontaneously form  
911 tissue cysts, but both parasite species form tissue cysts after 15 DPI. However, the percentage  
912 of *H. hammondi* tissue cysts is significantly increased after 15 DPI when compared to *T. gondii*.  
913 Numbers above bars indicate number of DBA+ vacuoles out of total vacuoles quantified.  
914 Statistical significance was determined using a 2-way ANOVA with Sidak's multiple comparison  
915 test. (\*\*\*\*=P<0.0001). C and D) Average percentage of DBA positive vacuoles in 15 FOV over a  
916 course of a 23 day infection with *T. gondii* (TgVEG) & *H. hammondi* (HhCatAmer). Arrows in (C)  
917 indicate when *T. gondii* was passed onto new host cells to prevent complete lysis. D) *H.*

918 *hammondi* form tissue cysts after 12 DPI. The percentage of DBA positive vacuoles increases  
919 until all vacuoles are DBA positive at 23 DPI. C) *T. gondii* forms tissue cysts at 8 DPI, however,  
920 the percentage of DBA positive vacuoles does not reach 100% during the 23 day infection.

921  
922 **Fig 4. Conditions that induced *T. gondii* tissue cyst formation *in vitro* do not induce**  
923 **tissue cyst formation for *H. hammondi*.** A) Representative images of cells infected with *T.*  
924 *gondii* (TgVEG) and *H. hammondi* (HhCatAmer) sporozoites that were grown for 2 days in pH  
925 7.2 media and switched to pH 8.2 media (bradyzoite induction conditions) for 2 days, fixed and  
926 stained with an Anti-*Toxoplasma gondii*/*Hammondia hammondi* antibody and DBA. Scale bar  
927 represents 5µm. B) Quantification of *T. gondii* and *H. hammondi* tissue cyst formation  
928 described in A demonstrating that *H. hammondi* does not form tissue cysts when exposed to  
929 conditions that promote tissue cyst formation in *T. gondii*. Number above bars indicated number  
930 of vacuoles quantified for each condition. Statistical significance was determined using a 2-way  
931 ANOVA with Tukey's multiple comparison test. (\*\*\*\*=P<0.0001). C) Number of parasites per  
932 vacuole for both *T. gondii* & *H. hammondi* grown at pH 7.2 and pH 8.2. *T. gondii* has  
933 significantly more parasites per vacuole than *H. hammondi* at both pH 7.2 and pH 8.2. There is  
934 no statistically significant difference between either *T. gondii* or *H. hammondi* between pH 7.2  
935 and pH 8.2. Statistical significance was determined using a 2-way ANOVA with Sidak's multiple  
936 comparison test. (\*\*=P<0.01 & \*\*\*\*=P<0.0001).

937  
938 **Fig 5. *H. hammondi* can be successfully subcultured *in vitro* for a limited period of time.**

939 A) Monolayers containing HhCatAmer with oocyst debris was needle passaged, filtered, and  
940 used to infect a confluent monolayer of HFFs seven days post-exystation. Vacuoles were  
941 observed in subcultured monolayers after 6 DPI. B-H) Confluent monolayers of HFFs were  
942 infected with HhCatAmer sporozoites at an MOI of ~2. (2,812,500 sporozoites). After a three  
943 hour incubation at 37° C, the Day 0 transfer flask was scraped, needle passaged, filtered, and

944 transferred to a new host cells. This process was repeated after 2, 5, 8, and 15 days of growth.  
945 Each flask was monitored daily for the number (C-H) for 13 DPI, or until visible vacuoles were  
946 no longer detected. The number of visible vacuoles increased in number for the first week post-  
947 excystation then began to decrease. Replicative capacity was greatest for sporozoites  
948 transferred to new host cells at Day 0 (C) and decreased during each subsequent passage. (D-  
949 H).

950

951 **Fig 6. *H. hammondi* parasites can be grown *in vitro* and then used to successfully infect**  
952 **mice.** A) Five Balb/c mice were infected intraperitoneally with *H. hammondi* zoites (HhCatAmer  
953 and HhCatEth1) grown in culture for 4 days. At either 4 or 9 DPI, parasite DNA was detected in  
954 the spleen and peritoneal lavage using PCR with *H. hammondi*-specific primers. Arrow  
955 indicates primary band for *H. hammondi*-specific PCR, although we also routinely see larger  
956 bands after PCR amplification. Samples were only considered positive if the 234 bp band was  
957 present (arrowhead). B-D) Two Balb/C mice were infected with ~50,000 *H. hammondi* zoites  
958 grown *in vitro* for 5 days. B) Serum was collected on days 2 and 3 and assayed for interferon-  
959  $\gamma$ . C) Three weeks post-infection, DNA was harvested from peritoneal lavage cells and spleen  
960 and assayed for *H. hammondi* DNA using *H. hammondi*-specific primers. D) Leg muscles from  
961 infected mice were sectioned and stained with *H. hammondi*-reactive anti *Toxoplasma*  
962 antibodies and compared to uninfected mice and mice infected with *H. hammondi* by oral  
963 gavage with 50,000 sporulated oocysts. E) *In vitro* cultivation leads to a dramatic and  
964 predictable loss in the ability to infect mice. Two BALB/C mice were infected with 50,000 *H.*  
965 *hammondi* American parasites after 6, 8, 10, 13, and 15 days of *in vitro* growth. The mass of the  
966 mice was monitored and a serum sample was obtained daily for 9 days post-infection. Analysis  
967 of interferon- $\gamma$  production was analyzed in serum samples using an ELISA. Mice infected with  
968 parasites grown *in vitro* for 6 days (1 of 2) showed spikes in interferon- $\gamma$  levels. This gamma  
969 spike was also observed in mice infected with parasites grown *in vitro* for 8 days (2 of 2). No

970 gamma spike was observed in mice infected with parasite grown *in vitro* for 10, 13, or 15 days.

971

972 **Fig 7. Generation of stable transgenic *Hammondia hammondi*.** A) *H. hammondi* zoites co-  
973 transfected with CRISPR/CAS9-GFP and a plasmid harboring a *T. gondii* dsRED expression  
974 cassette. We identified multiple parasites with both GFP-tagged nuclei (due to CAS9-GFP  
975 expression) and dsRED-tagged cytoplasm, indicating uptake of both plasmids within the same  
976 parasites. B) Protocol for generating stably transgenic *H. hammondi* using flow cytometry and  
977 drug selection to enrich for transgenic parasites prior to cat infections. C,D) Testing FUDR  
978 resistance in transgenic *H. hammondi* parasites. WT and transgenic *H. hammondi* sporozoites  
979 were incubated in the presence or absence of 20  $\mu$ M FUDR, and vacuole size and  
980 presence/absence of dsRED was quantified in at least 100 vacuoles per treatment condition.  
981 While WT and non-dsRED-expressing *H. hammondi* from the transgenic population were highly  
982 susceptible to FUDR treatment (as evidenced by the fact that the majority of vacuoles contained  
983 only 1 parasite), dsRED expressing transgenic parasites were resistant to FUDR treatment,  
984 confirming that the parasites harbored two genetic markers.

985

986 **Fig 8. mRNAseq comparisons between *T. gondii* and *H. hammondi* identify unique**  
987 **aspects of the *H. hammondi* transcriptome.** A) Summary of reads obtained for each  
988 parasite species and life stage, and the percentage of reads from each that mapped to the  
989 respective parasite genomes or transcriptomes. Log<sub>2</sub>-transformed and normalized Fragments  
990 Per Million (FPM) data for the 4276 shared genes between *T. gondii* and *H. hammondi* that  
991 passed thresholds for detection in both species. Genes of significantly different abundance  
992 (based on criteria as listed in inset) are blue. C) Gene Sets found to be significantly (FDR q-  
993 value < 0.05) enriched in *H. hammondi* high-abundance transcripts (top) or *T. gondii* high-  
994 abundance transcripts (bottom) at either 4 or 15 days post-exystation. Gene Set Details can be  
995 found in Table 2. \*: P<0.05; \*\*: P<0.01; \*\*\*: P<0.001. D) GSEA plots of the *In vitro*



996 bradyzoite, *in vitro* tachyzoite, and Cat stage specific 1 gene sets, showing enrichment profiles  
997 between *H. hammondi* and *T. gondii* at 15 DPI. NES; Normalized enrichment score. FDR q:  
998 False discovery rate q-value.

999

1000 **Fig 9. Analysis of the overlap between genes found to be of significantly different**  
1001 **abundance at D4 and D15 PI across different gene sets.** A) While overall there are distinct  
1002 genes that are significantly different at D4 and D15 (Venn diagram, upper left), *H. hammondi*  
1003 expresses high numbers of bradyzoite genes even at 4 dPI and this number increases further  
1004 by D15 (21 additional genes; Venn diagram in upper right). This progression towards an  
1005 increase in the number of bradyzoite genes over time is not recapitulated among merozoite-  
1006 specific genes, in that only 4 additional detectable genes from this gene set were found to be of  
1007 significantly higher abundance at 15 DPI. Moreover 18 of the 22 total detectable merozoite  
1008 genes were of significantly different abundance in *H. hammondi*, indicating its transcriptional  
1009 similarity to both bradyzoites and merozoites. B-D) Heat maps showing detectable genes from  
1010 the bradyzoite, tachyzoite and merozoite-specific gene sets. B) Bradyzoite genes (raw log<sub>2</sub>  
1011 FPM data shown). C) Merozoite-specific genes (raw Log<sub>2</sub> FPM data shown). D) Tachyzoite-  
1012 specific genes (mean centered Log<sub>2</sub> FPM data shown).

1013

## 1014 **Supporting information**

1015 **S1 Fig. *H. hammondi* vacuole sizes following subculture.** A-D) Visible vacuoles sizes were  
1016 measured using ImageJ (NIH) for each day of attempted subculture. For each day when  
1017 successful subculture was detected (Fig 5 C-H), vacuoles appear to grown in size, until they  
1018 reach a plateau prior to the disappearance of vacuoles.

1019

1020 **S2 Fig. Validation of transgenic *H. hammondi*.** PCR validation of *H. hammondi* dsRED-

1021 expressing parasites using *H. hammondi* and *T. gondii*-specific primers (see Table S2 for primer  
1022 sequences).

1023

1024 **S3 Fig. Transcriptional profiling and Gene Set Enrichment Analysis of *T. gondii* and *H.***

1025 ***hammondi*.** A) Hierarchical cluster (Euclidean distance, complete) of all 4276 genes with  
1026 detectable expression in *T. gondii* and *H. hammondi*. Raw Log<sub>2</sub> transformed FPM values (taken  
1027 from DESeq2 following normalization and transformation using “rlog”) are shown. B) Gene set  
1028 enrichment analysis results identifying gene sets that were significantly difference between D4  
1029 and D15 for each species. Gene sets are described in Table 2. \*: P<0.05; \*\*:P<0.01;  
1030 \*\*\*:P<0.001.

1031

1032 **S4 Fig. qPCR validation for 9 transcripts that were found to be of higher abundance in *H.***

1033 ***hammondi* compared to *T. gondii*.** A) RNAseq expression profile of HhCatEth1 and TgVEG  
1034 at 4 and 15 DPI. B) qPCR validation of 9 transcripts demonstrate significantly higher transcript  
1035 level in HhCatEth1 compared to TgVEG at day 4 (9 genes) and/or day 15 (2 genes) pi. Fold  
1036 difference of HhCatEth1 genes relative to TgVEG is shown; bars represent mean and SD from  
1037 three biological replicates. Significance determined from  $\Delta$ Ct values using multiple t-tests and  
1038 the Holm-Sidak method, with alpha=5.0%. Calcium dependent protein kinase 1 (CDPK1) served  
1039 as a control.

1040

1041 **Supplementary Table 2: Primer sequences**

| Gene                           | Toxodb.org ID | Purpose           | 5' sequence                | 3' sequence                |
|--------------------------------|---------------|-------------------|----------------------------|----------------------------|
| DENSE GRANULE PROTEIN 1 (GRA1) | HHA_270250    | qpcr control gene | GAGGAGGTGATG<br>GAGACTATGA | CTCTACTGTCTCG<br>CCTTTGTTT |
| DENSE GRANULE PROTEIN 1 (GRA1) | TGVEG_270250  | qpcr control gene | TTAACGTGGAGGA<br>GGTGATTG  | TCCTCTACTGTTTC<br>GCCTTTG  |
| SAG-RELATED SEQUENCE SRS27B    | HHA_258810    | qpcr              | ACAATACCCACCA<br>TAACGACAG | AAGGCTGCCATAC<br>ACAAGAG   |

|                                             |              |                                                                        |                             |                              |
|---------------------------------------------|--------------|------------------------------------------------------------------------|-----------------------------|------------------------------|
| RHOPTRY PROTEIN ROP18                       | HHA_205250   | qpcr                                                                   | GACGGCCTCTTG<br>GACTATTTAC  | TCCGTTTCTTAGG<br>CTGTTGATT   |
| WD DOMAIN, G-BETA REPEAT-CONTAINING PROTEIN | HHA_219450   | qpcr                                                                   | ACACTCTACCCGA<br>GGAATACA   | AGATTCCGCCTCC<br>CTTATCT     |
| HYPOTHETICAL PROTEIN_1                      | HHA_253150   | qpcr                                                                   | ATTGGCACTCAGG<br>GTCTTTC    | CCTGCCTTCTTGA<br>GCTTCTT     |
| PUTATIVE TRANSMEMBRANE PROTEIN              | HHA_215328   | qpcr                                                                   | CTCTGCAAACGCG<br>CATATTT    | AGAAATCCAGCTG<br>TGGTATGG    |
| HYPOTHETICAL PROTEIN_3                      | HHA_278680   | qpcr                                                                   | CACACAGCGCCTA<br>GATAGTT    | GGGTGATGTGGCT<br>GAAGAT      |
| SAG-RELATED SEQUENCE SRS23                  | HHA_239090   | qpcr                                                                   | TGGACCCTAAGGA<br>CGTACAA    | GATCCATCGACAA<br>GGGAAGTG    |
| AP2 DOMAIN TRANSCRIPTION FACTOR AP2IV-4     | HHA_318470   | qpcr                                                                   | CTGGAGAGCGAA<br>GGGAATG     | GACTGGAGAGGGA<br>GAATGAAAG   |
| AP2 DOMAIN TRANSCRIPTION FACTOR AP2VI-1     | HHA_240460   | qpcr                                                                   | CACTGAGGCCTAT<br>TCAGAGATG  | CATGACTTTCCGG<br>GTTTCTTTG   |
| CALCIUM-DEPENDENT PROTEIN KINASE (CDPK1)    | HHA_301440   | qpcr                                                                   | ACTGACAGCCATC<br>TTCCATAAG  | ACTGGAATCTTGA<br>CCCTTCATC   |
| SAG-RELATED SEQUENCE SRS27B                 | TGVEG_258810 | qpcr                                                                   | CGTAAGGGAGGA<br>TCAGAGAATG  | CCATCCGACTTCT<br>TGCATTTG    |
| RHOPTRY PROTEIN ROP18                       | TGVEG_205250 | qpcr                                                                   | GACGGCATCTGG<br>GACTATTT    | GTTTCTGAGGCTC<br>TCGATTCA    |
| WD DOMAIN, G-BETA REPEAT-CONTAINING PROTEIN | TGVEG_219450 | qpcr                                                                   | ACGGGCCTAAGA<br>CACAATTC    | ACGCCAAGAGAAC<br>TCGAAAG     |
| HYPOTHETICAL PROTEIN_1                      | TGVEG_253150 | qpcr                                                                   | ATTGGCACTCAGG<br>GTCTTTC    | CCTGCCTTCTTGA<br>GCTTCTT     |
| PUTATIVE TRANSMEMBRANE PROTEIN              | TGVEG_215328 | qpcr                                                                   | CCGAGACAACGA<br>GGATGAATAC  | CGTCAGTACTCGA<br>GGAGAAGTA   |
| HYPOTHETICAL PROTEIN_3                      | TGVEG_278680 | qpcr                                                                   | CACACAGCGCCTA<br>GATAGTTT   | AGAGGATGATTTG<br>GCTGAAGG    |
| SAG-RELATED SEQUENCE SRS23                  | TGVEG_239090 | qpcr                                                                   | GCTCTCACTTCCC<br>TTGTTGAT   | CGGCTGGGAGTTC<br>ACTTATAC    |
| AP2 DOMAIN TRANSCRIPTION FACTOR AP2IV-4     | TGVEG_318470 | qpcr                                                                   | CTGGAGAGCGAA<br>GGGAATG     | GACTGGAGAGGGA<br>GAATGAAAG   |
| AP2 DOMAIN TRANSCRIPTION FACTOR AP2VI-1     | TGVEG_240460 | qpcr                                                                   | CTCAACTAACCAC<br>AGACCCATAG | CACTTCCAACTTC<br>CGCTATCT    |
| CALCIUM-DEPENDENT PROTEIN KINASE (CDPK1)    | TGVEG_301440 | qpcr                                                                   | GACTCCGACAAC<br>CAGGAAAG    | GACTTCGCCGTCG<br>TTATTCT     |
| UPRT, primer: Tox4                          | N/A          | Distinguish<br>h <i>T. gondii</i><br>from <i>H.</i><br><i>hammondi</i> | ACCGCGGAGCCG<br>AAGTGCGTTT  | ATCGCATTCCGGT<br>GTCTCTTTTTT |

|                        |     |                                                                       |                                                             |                                                             |
|------------------------|-----|-----------------------------------------------------------------------|-------------------------------------------------------------|-------------------------------------------------------------|
| UPRT_dsred, for crispr | N/A | dsRED<br>Repair<br>Template<br>with<br>UPRT-<br>targeting<br>flanks   | AGTTTCCTTTTACT<br>CCAAGATCTGTAT<br>AGCGTGGTACTCG<br>TCACGAA | CAAGCCGCTTTCC<br>ATCGACTCGCCAG<br>TCGACTGGAATA<br>CGGTGTTTG |
| Hham34F, Hham3R        | N/A | Distinguis<br>h <i>T. gondii</i><br>from <i>H.</i><br><i>hammondi</i> | ATCCCATTCGGC<br>TTCAGTCTTTC                                 | ACAGCGGAGCCGA<br>AGTTGGTTT                                  |

**A**

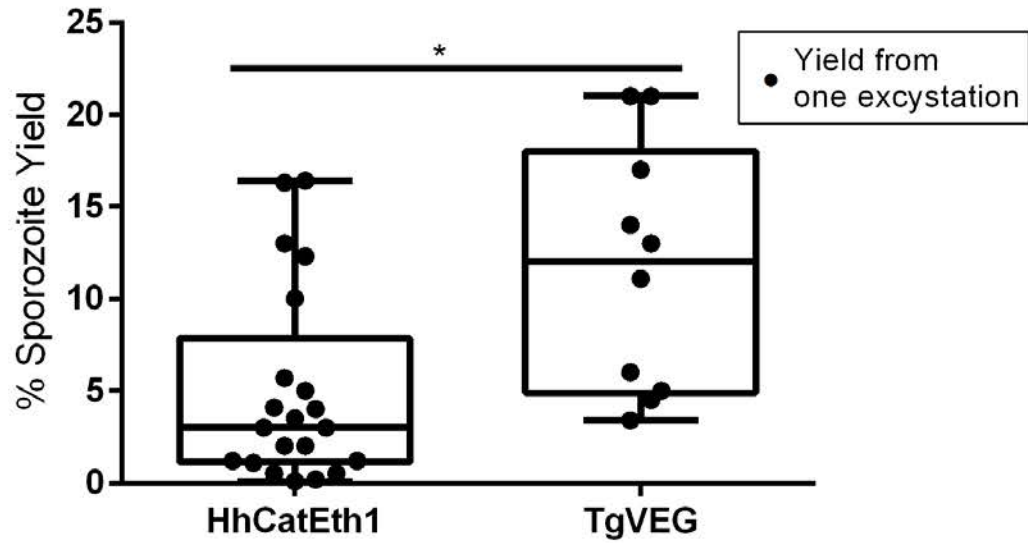

**B**

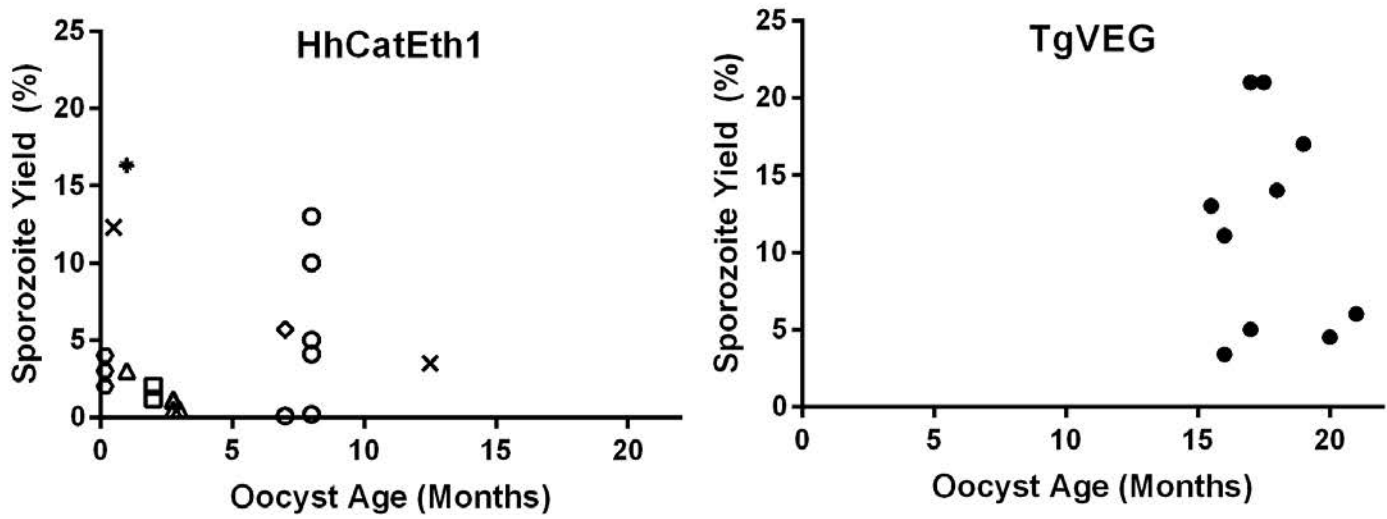

**C**

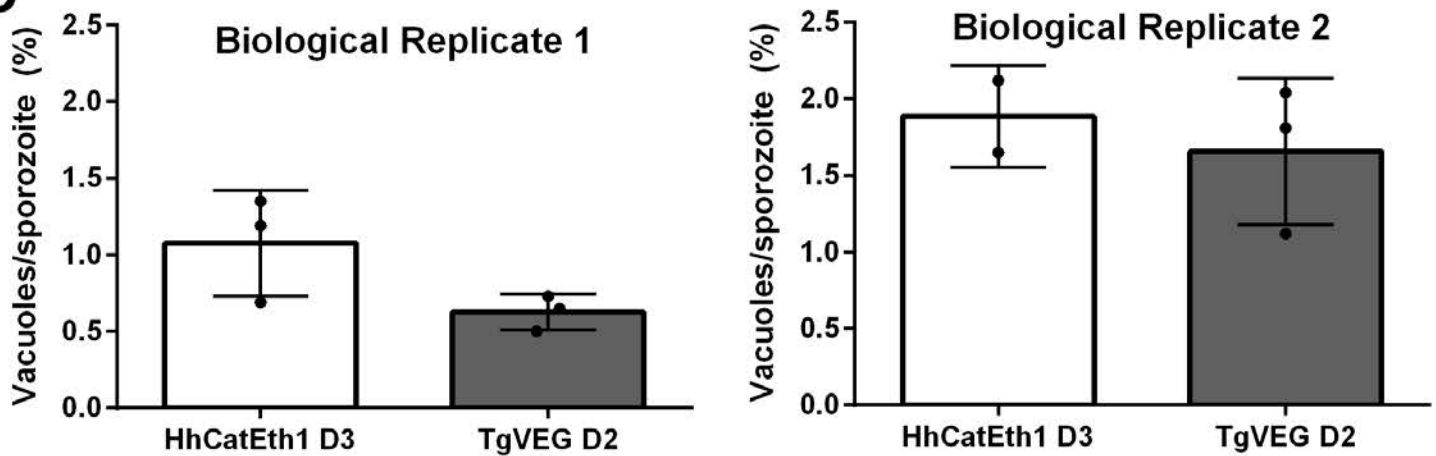

**A**

**Day 1**

**Day 2**

**Day 3**

**TgVEG**  
**HhCatEth1**

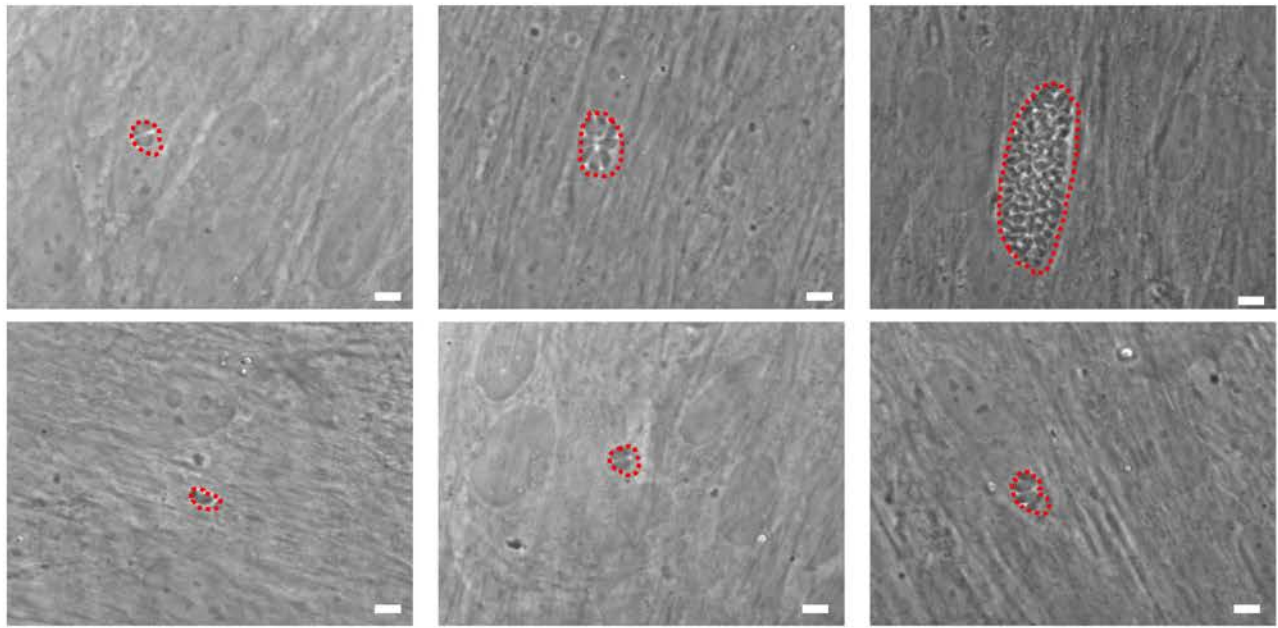

**B**

**Replicate 1**

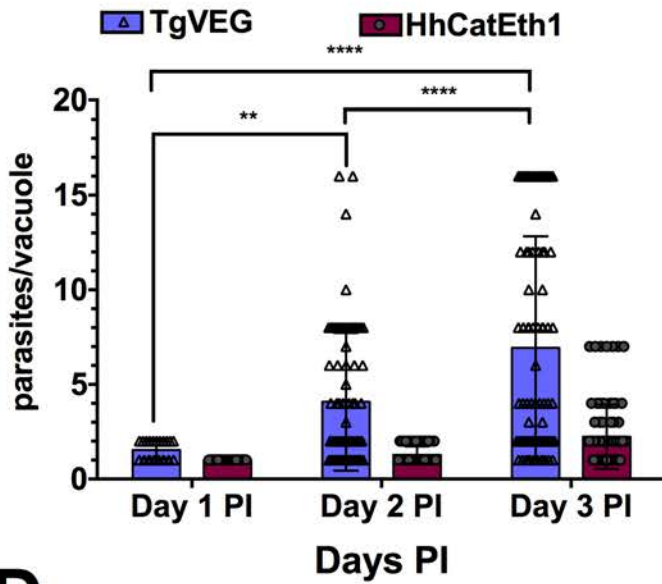

**C**

**Replicate 2**

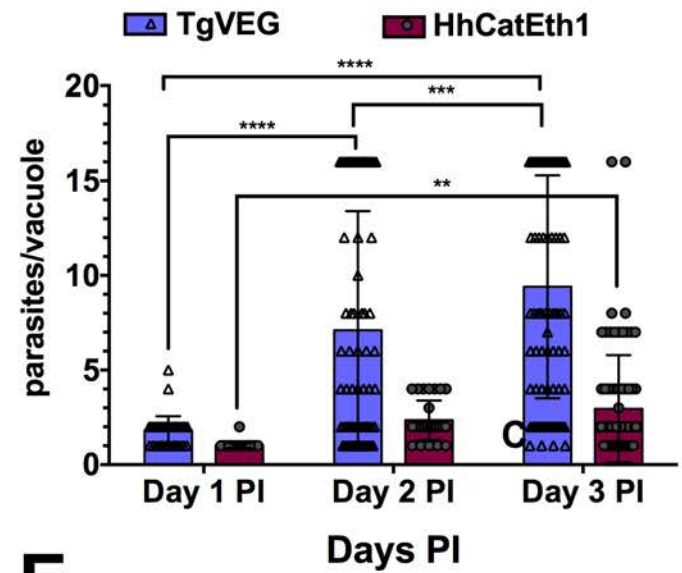

**D**

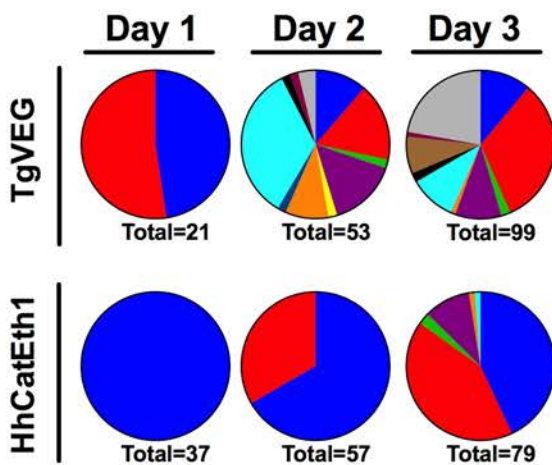

**E**

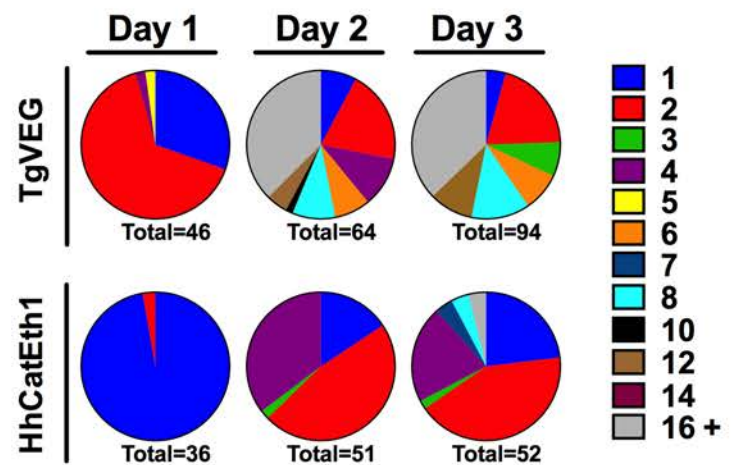

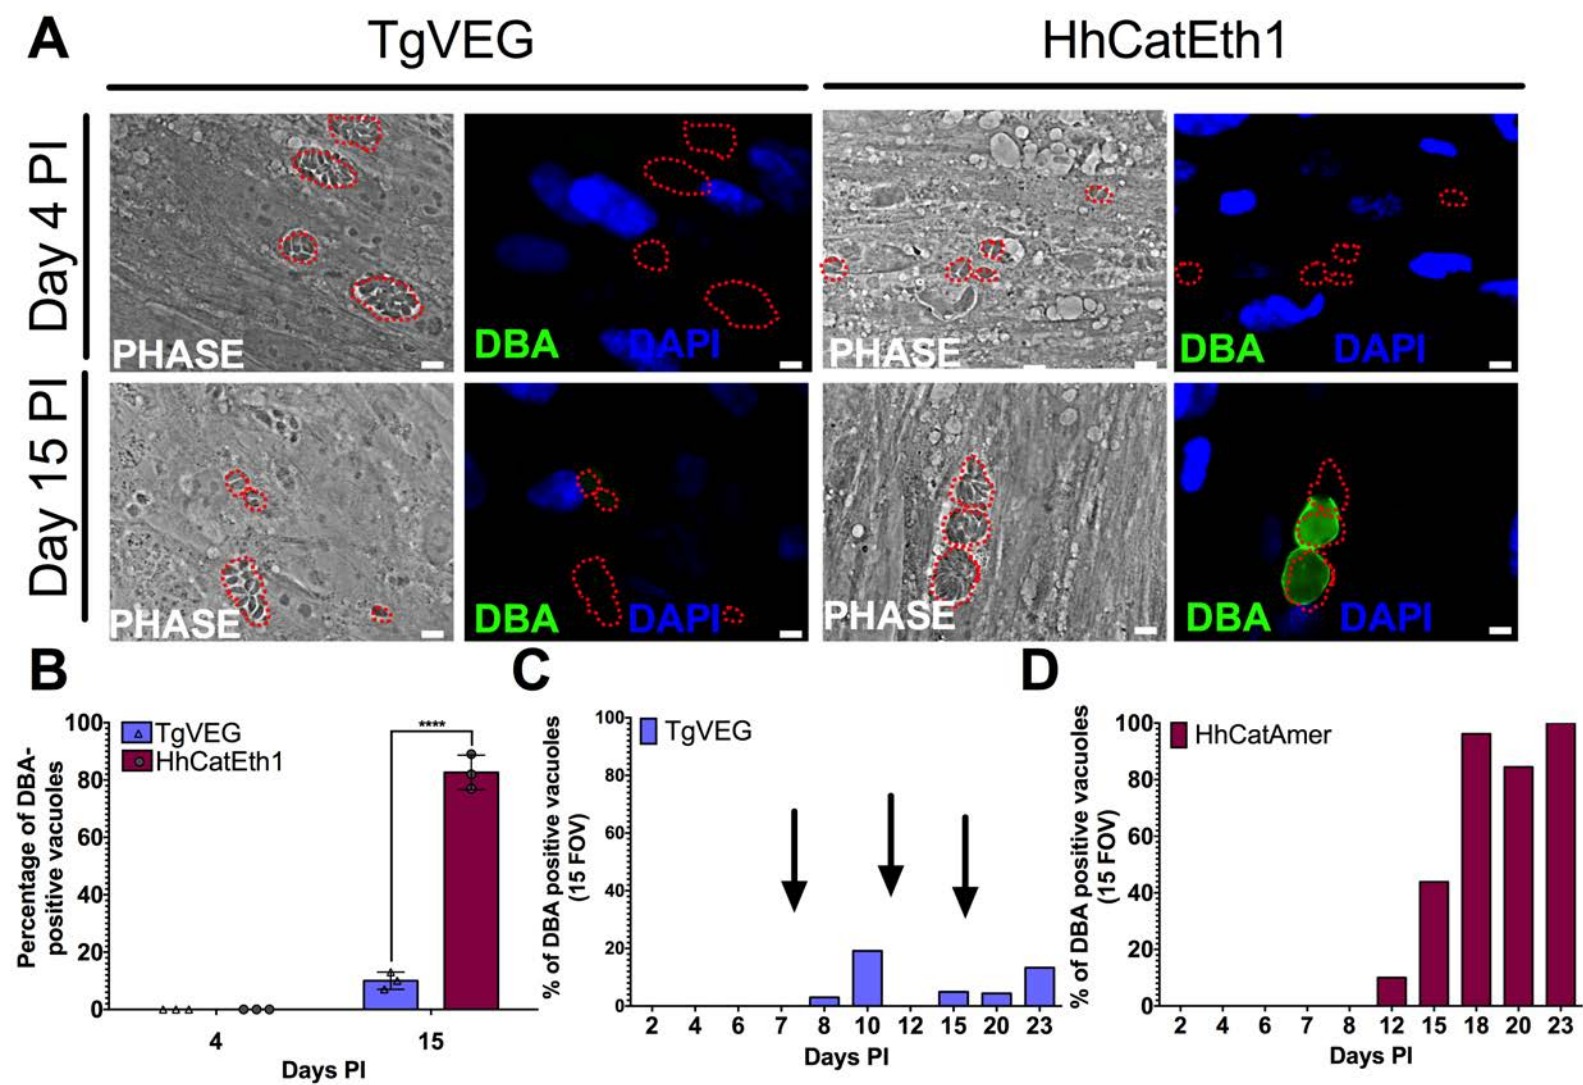

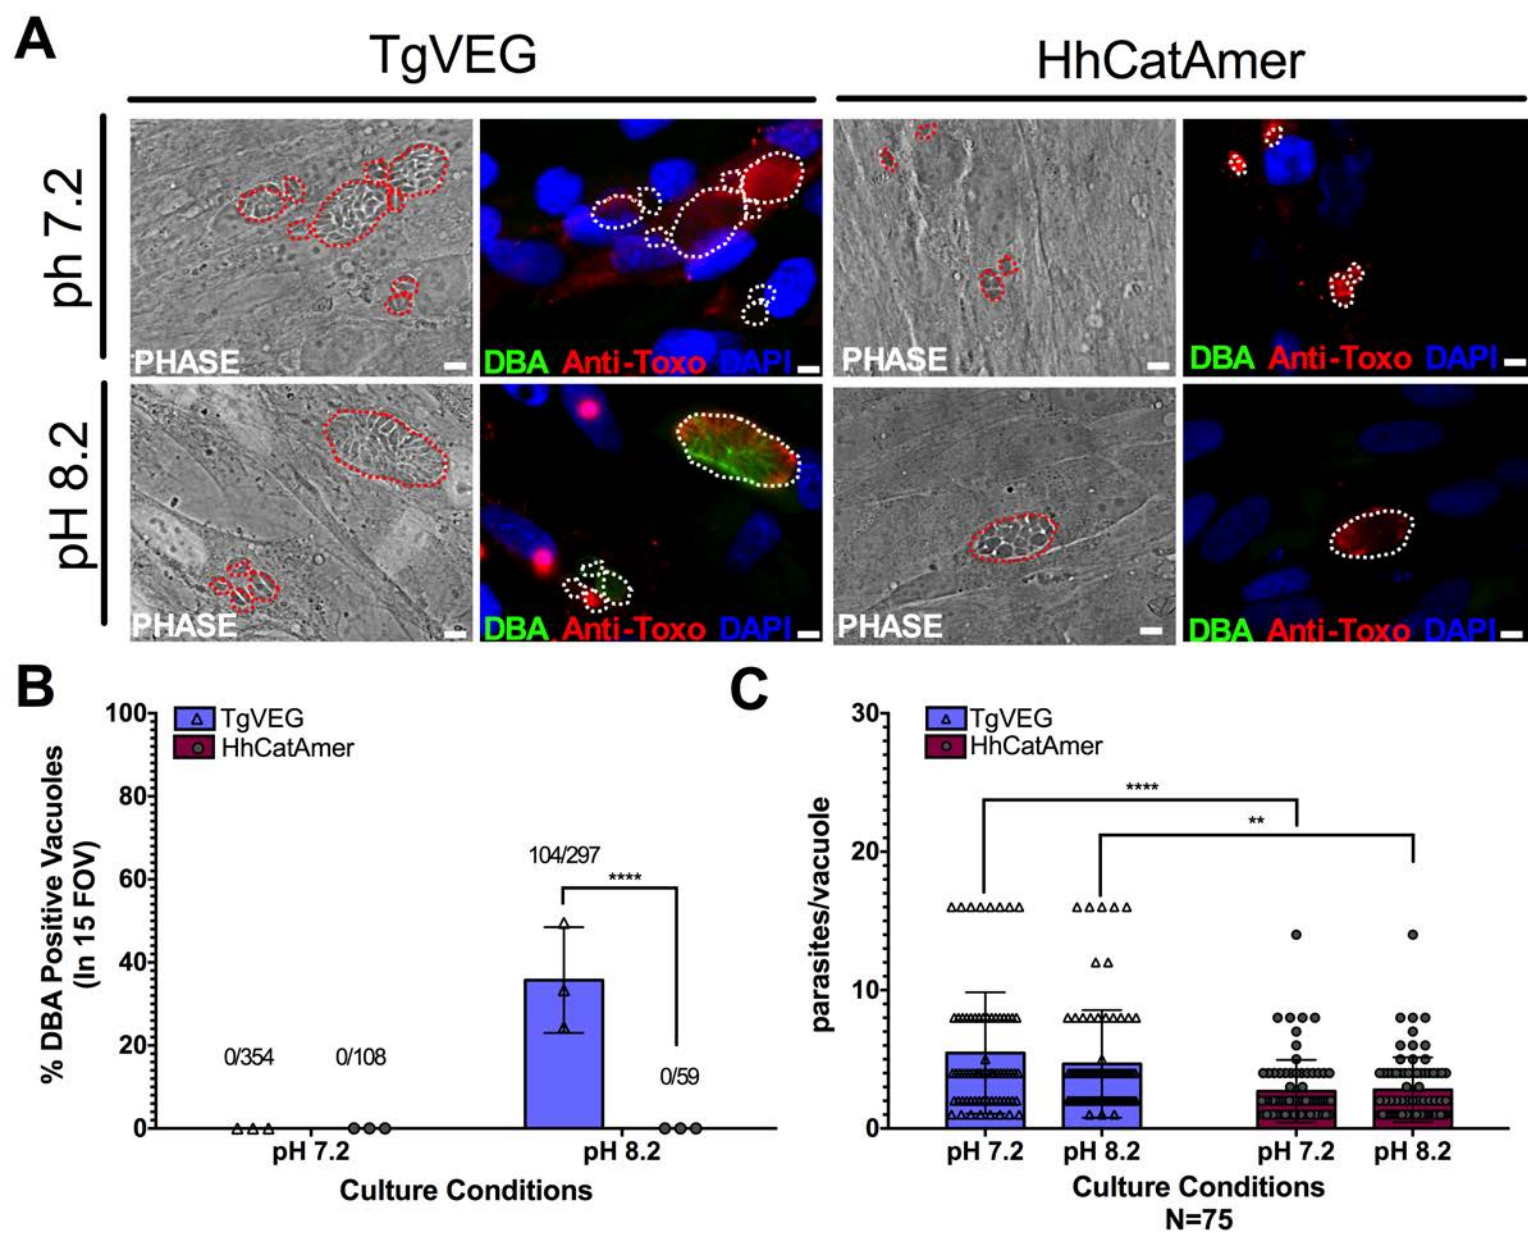



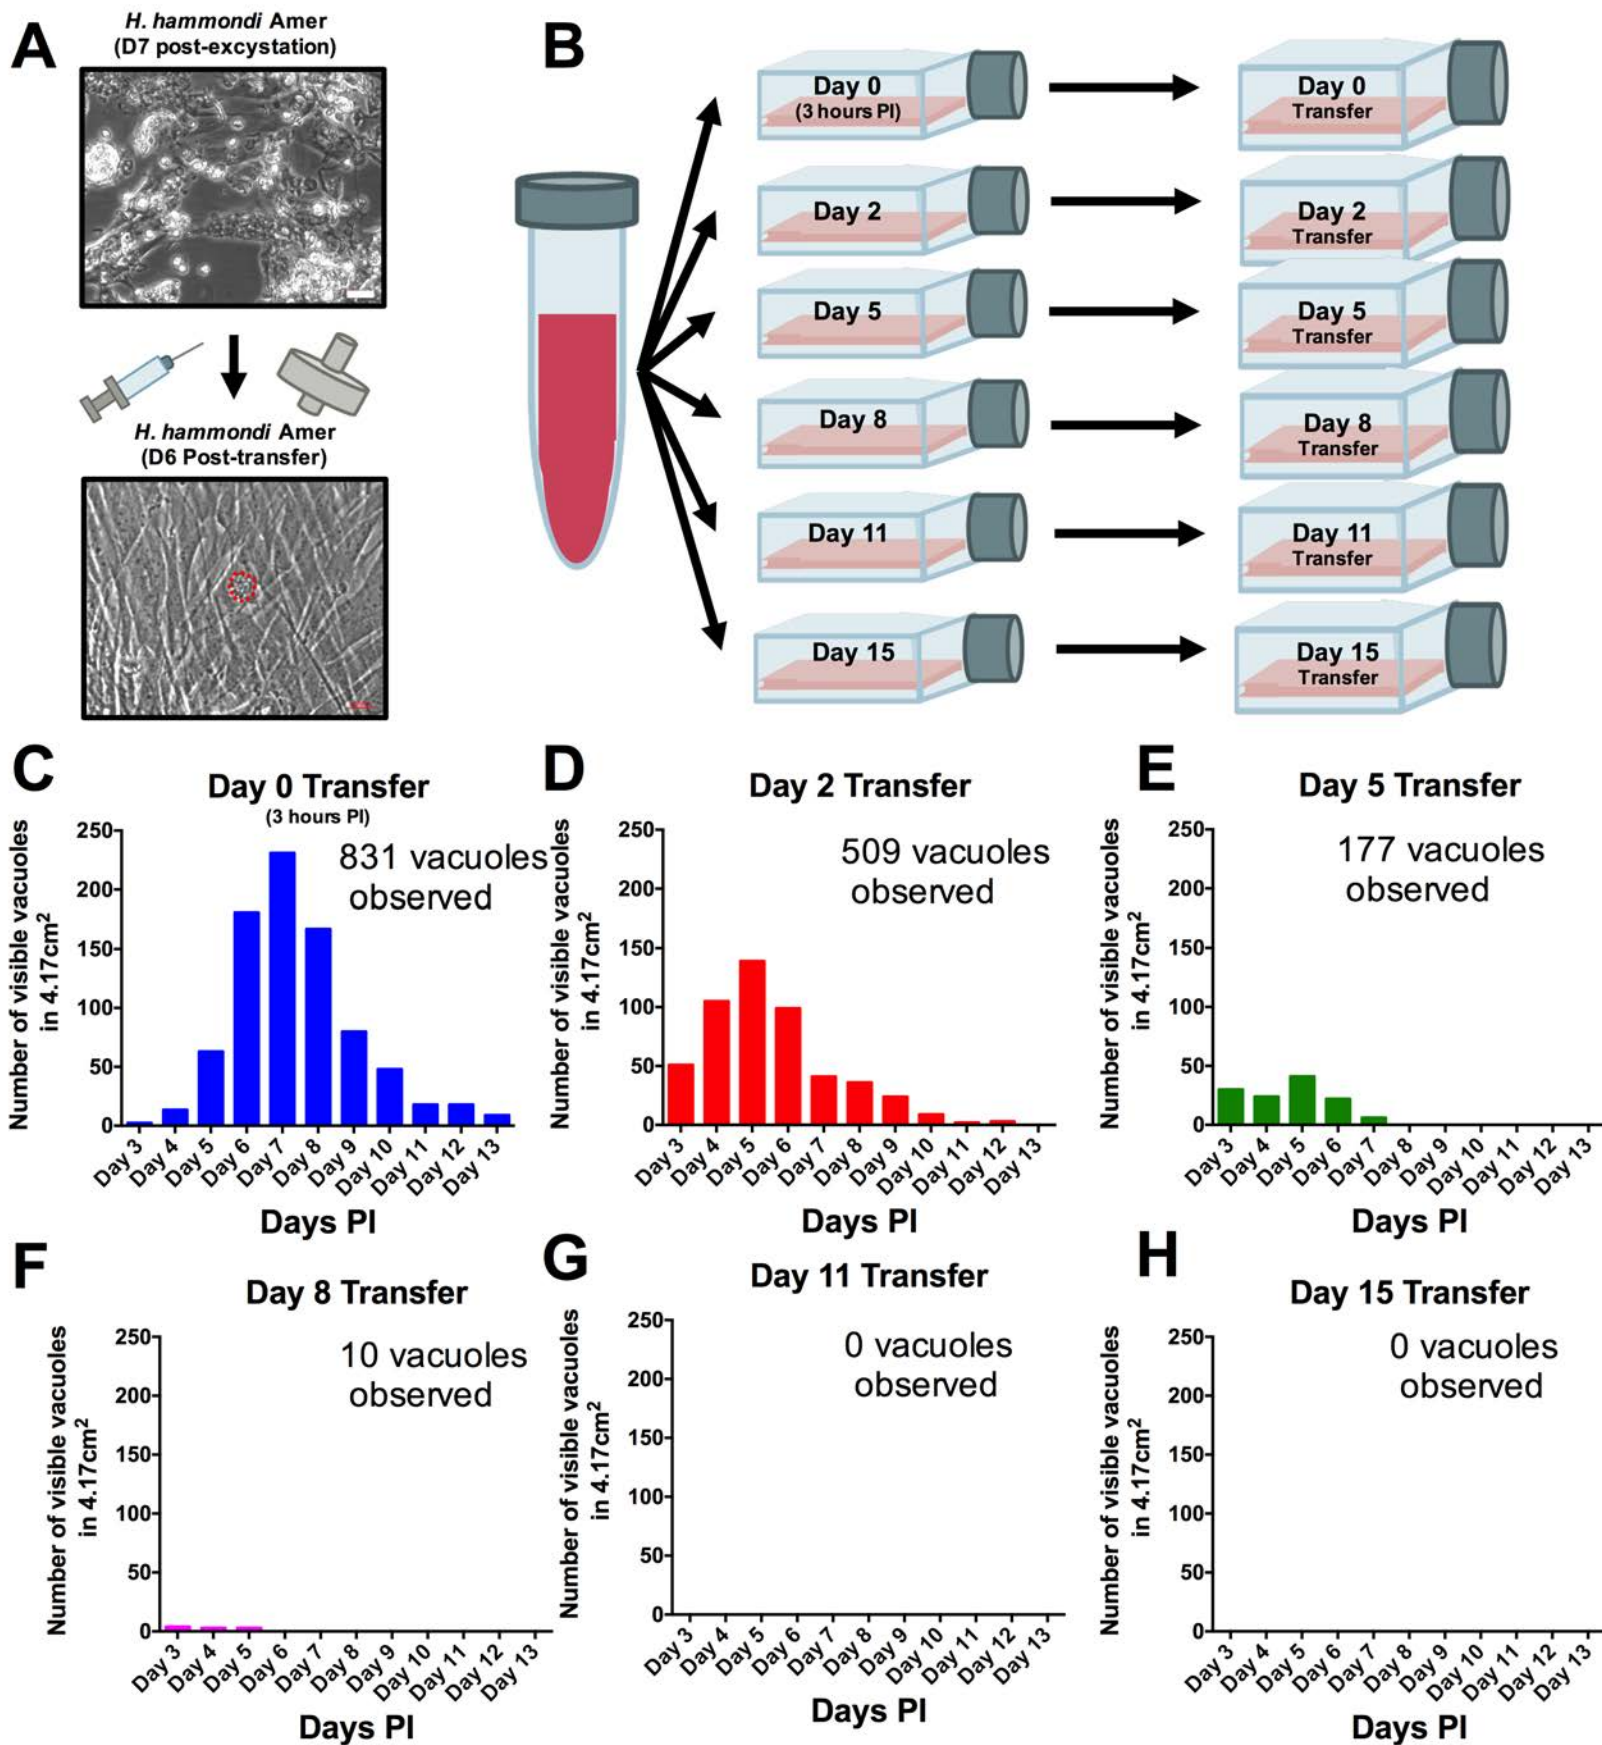

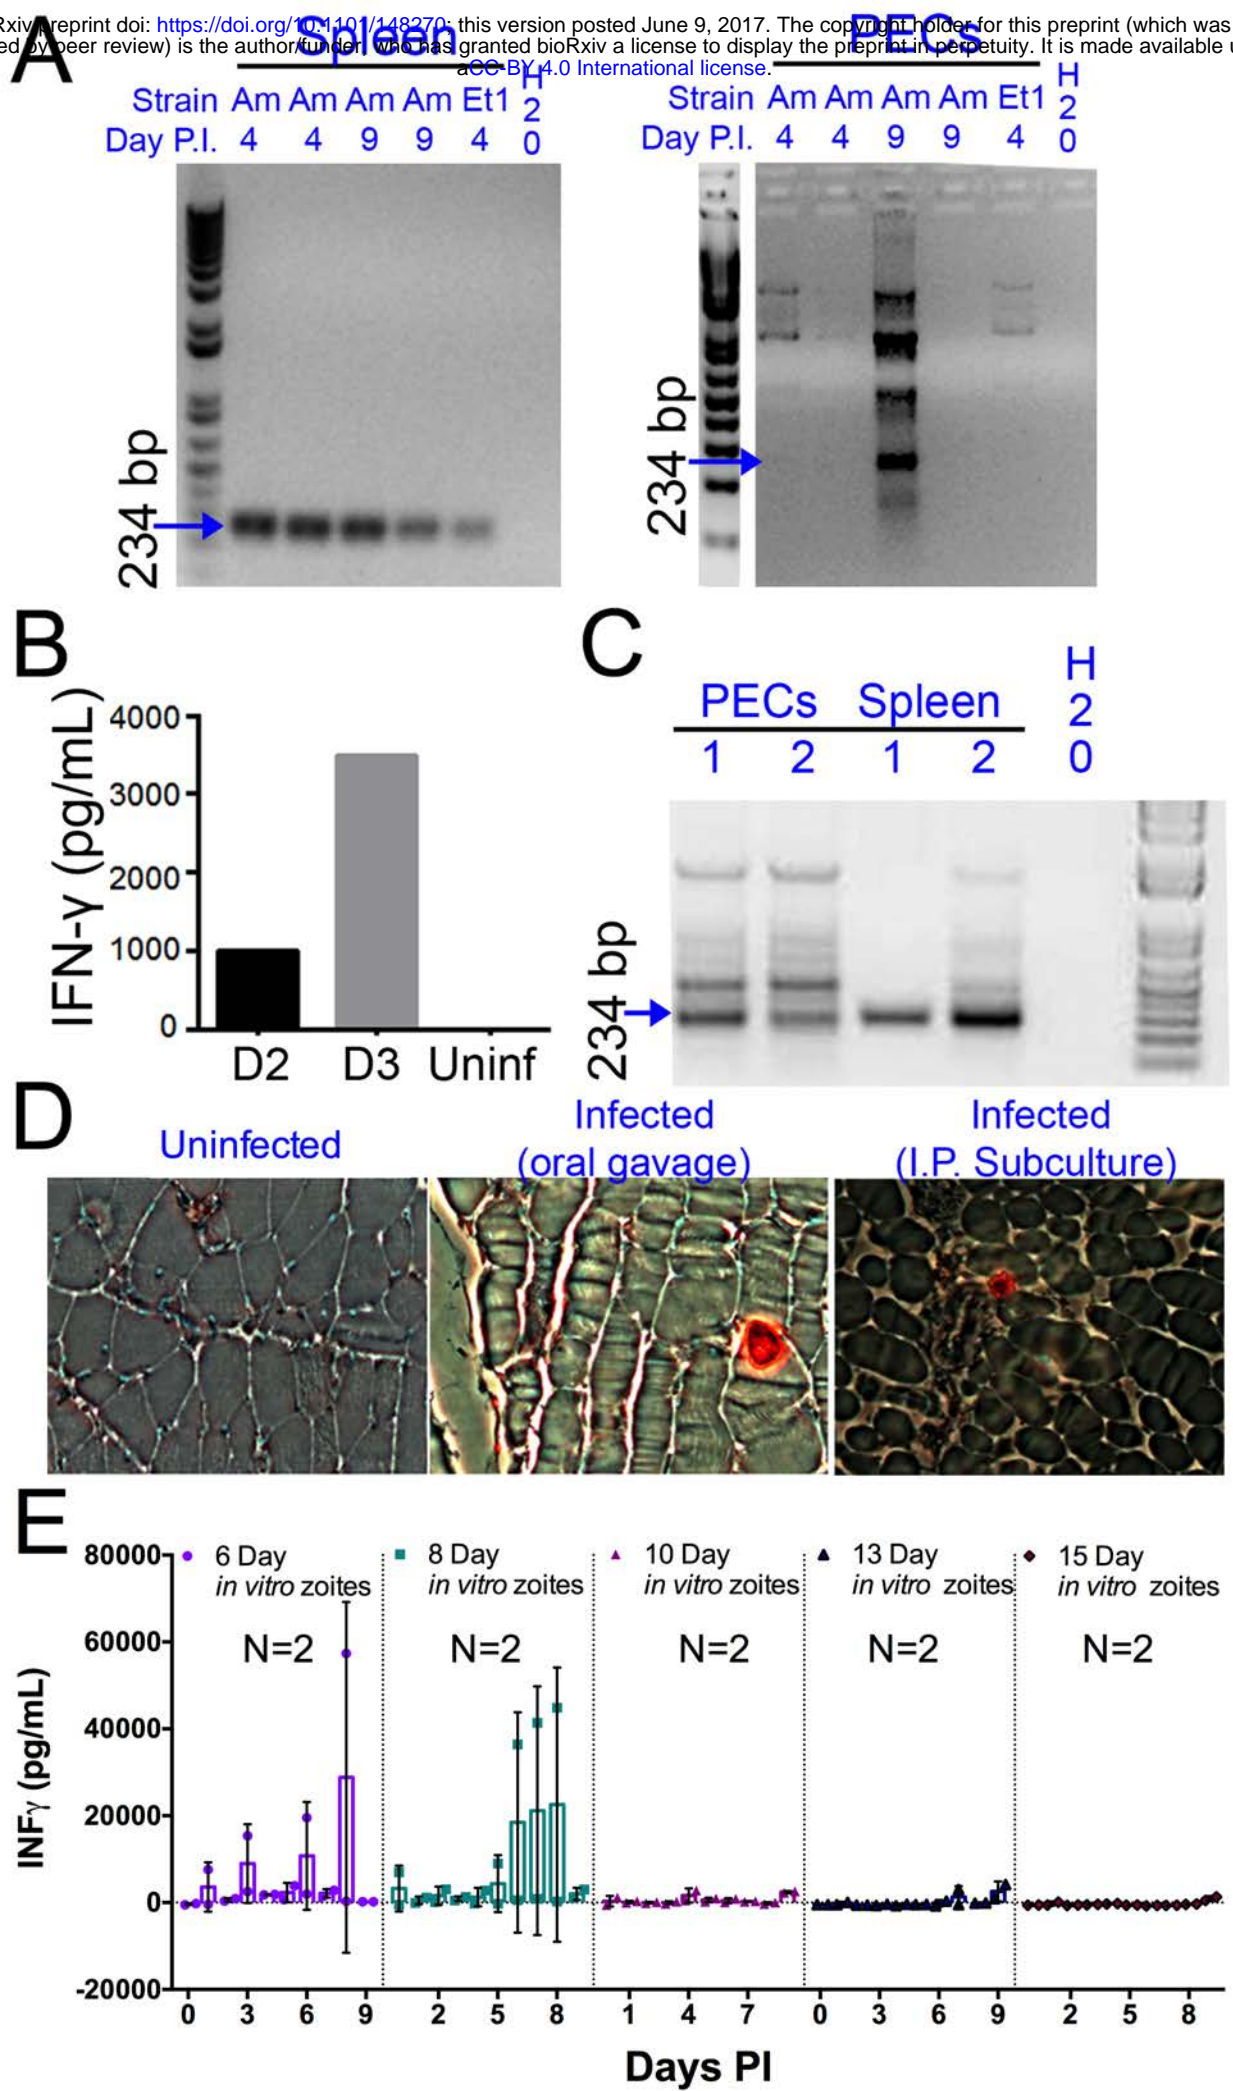

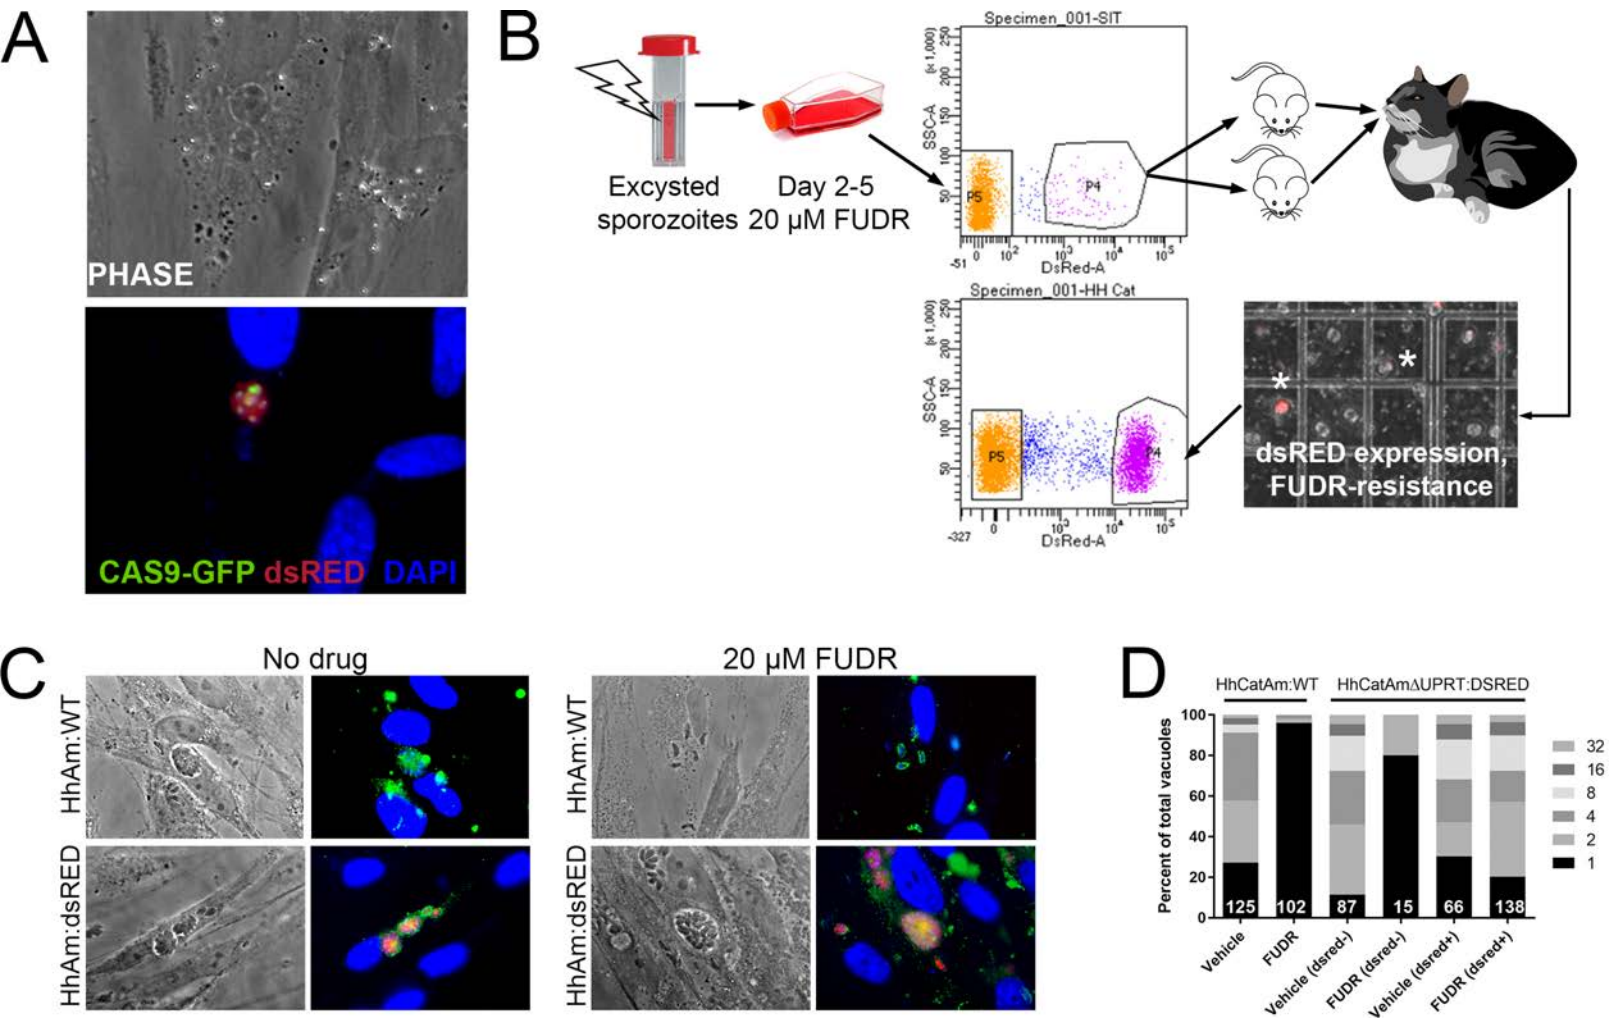

**A**

| Sample          | Reads     | Reads mapped to genome |      | Reads mapped to transcriptome |      |
|-----------------|-----------|------------------------|------|-------------------------------|------|
|                 |           | Total                  | %    | Total                         | %    |
| HhCatEth1 sz    | 30072166  | 28531132               | 94.9 | 15370058                      | 51.1 |
| HhCatEth1 d4 1  | 25082591  | 542766                 | 2.2  | 287439                        | 1.1  |
| HhCatEth1 d4 2  | 29487526  | 344563                 | 1.2  | 143474                        | 0.5  |
| HhCatEth1 d15 1 | 188171285 | 301944                 | 0.2  | 98421                         | 0.1  |
| HhCatEth1 d15 2 | 216805351 | 311174                 | 0.1  | 74946                         | 0.0  |
| HhCatEth1 d15 3 | 211118805 | 383959                 | 0.2  | 113900                        | 0.1  |
| TgVEG d4 1      | 13907167  | 1807932                | 13.0 | 1001316                       | 7.2  |
| TgVEG d4 1      | 17464273  | 2165570                | 12.4 | 960535                        | 5.5  |
| TgVEG d15 1     | 28399000  | 2413915                | 8.5  | 1363152                       | 4.8  |
| TgVEG d15 2     | 47567750  | 3757852                | 7.9  | 2092981                       | 4.4  |
| TgVEG d15 3     | 52259373  | 4651084                | 8.9  | 2665228                       | 5.1  |

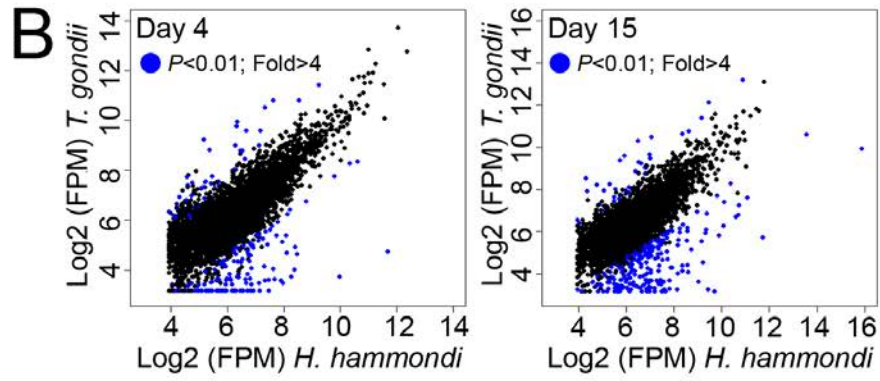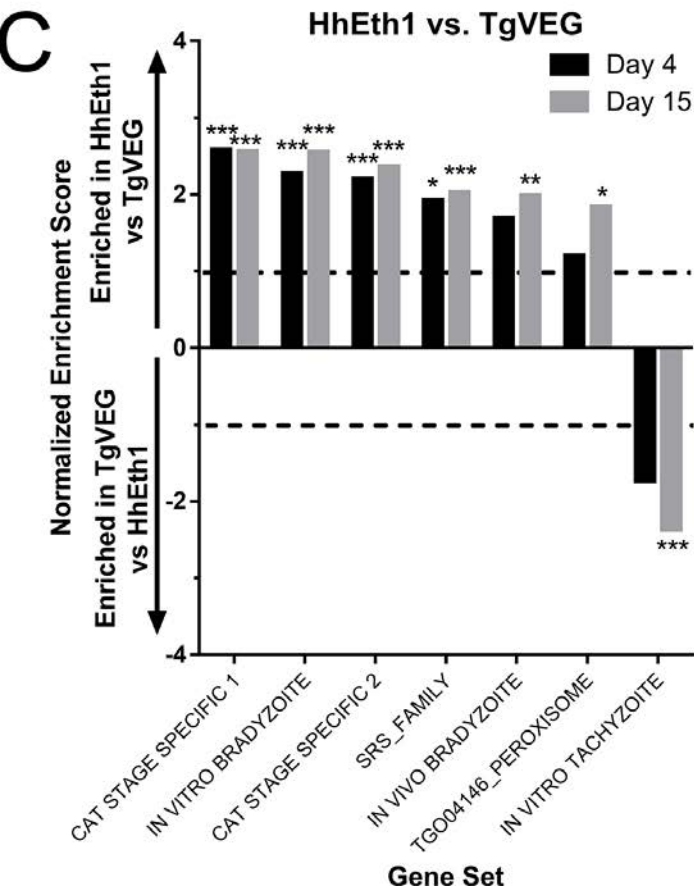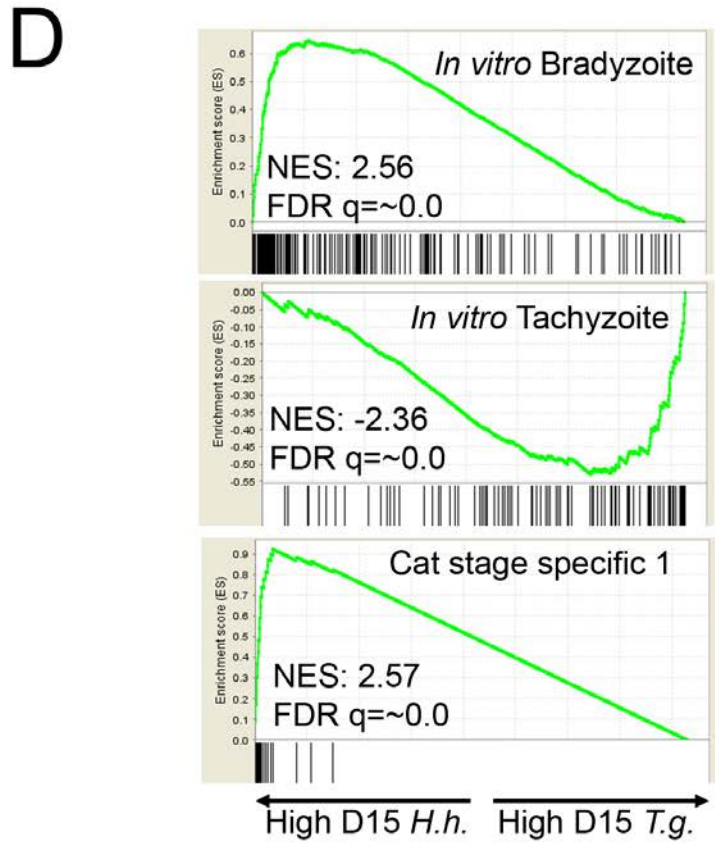

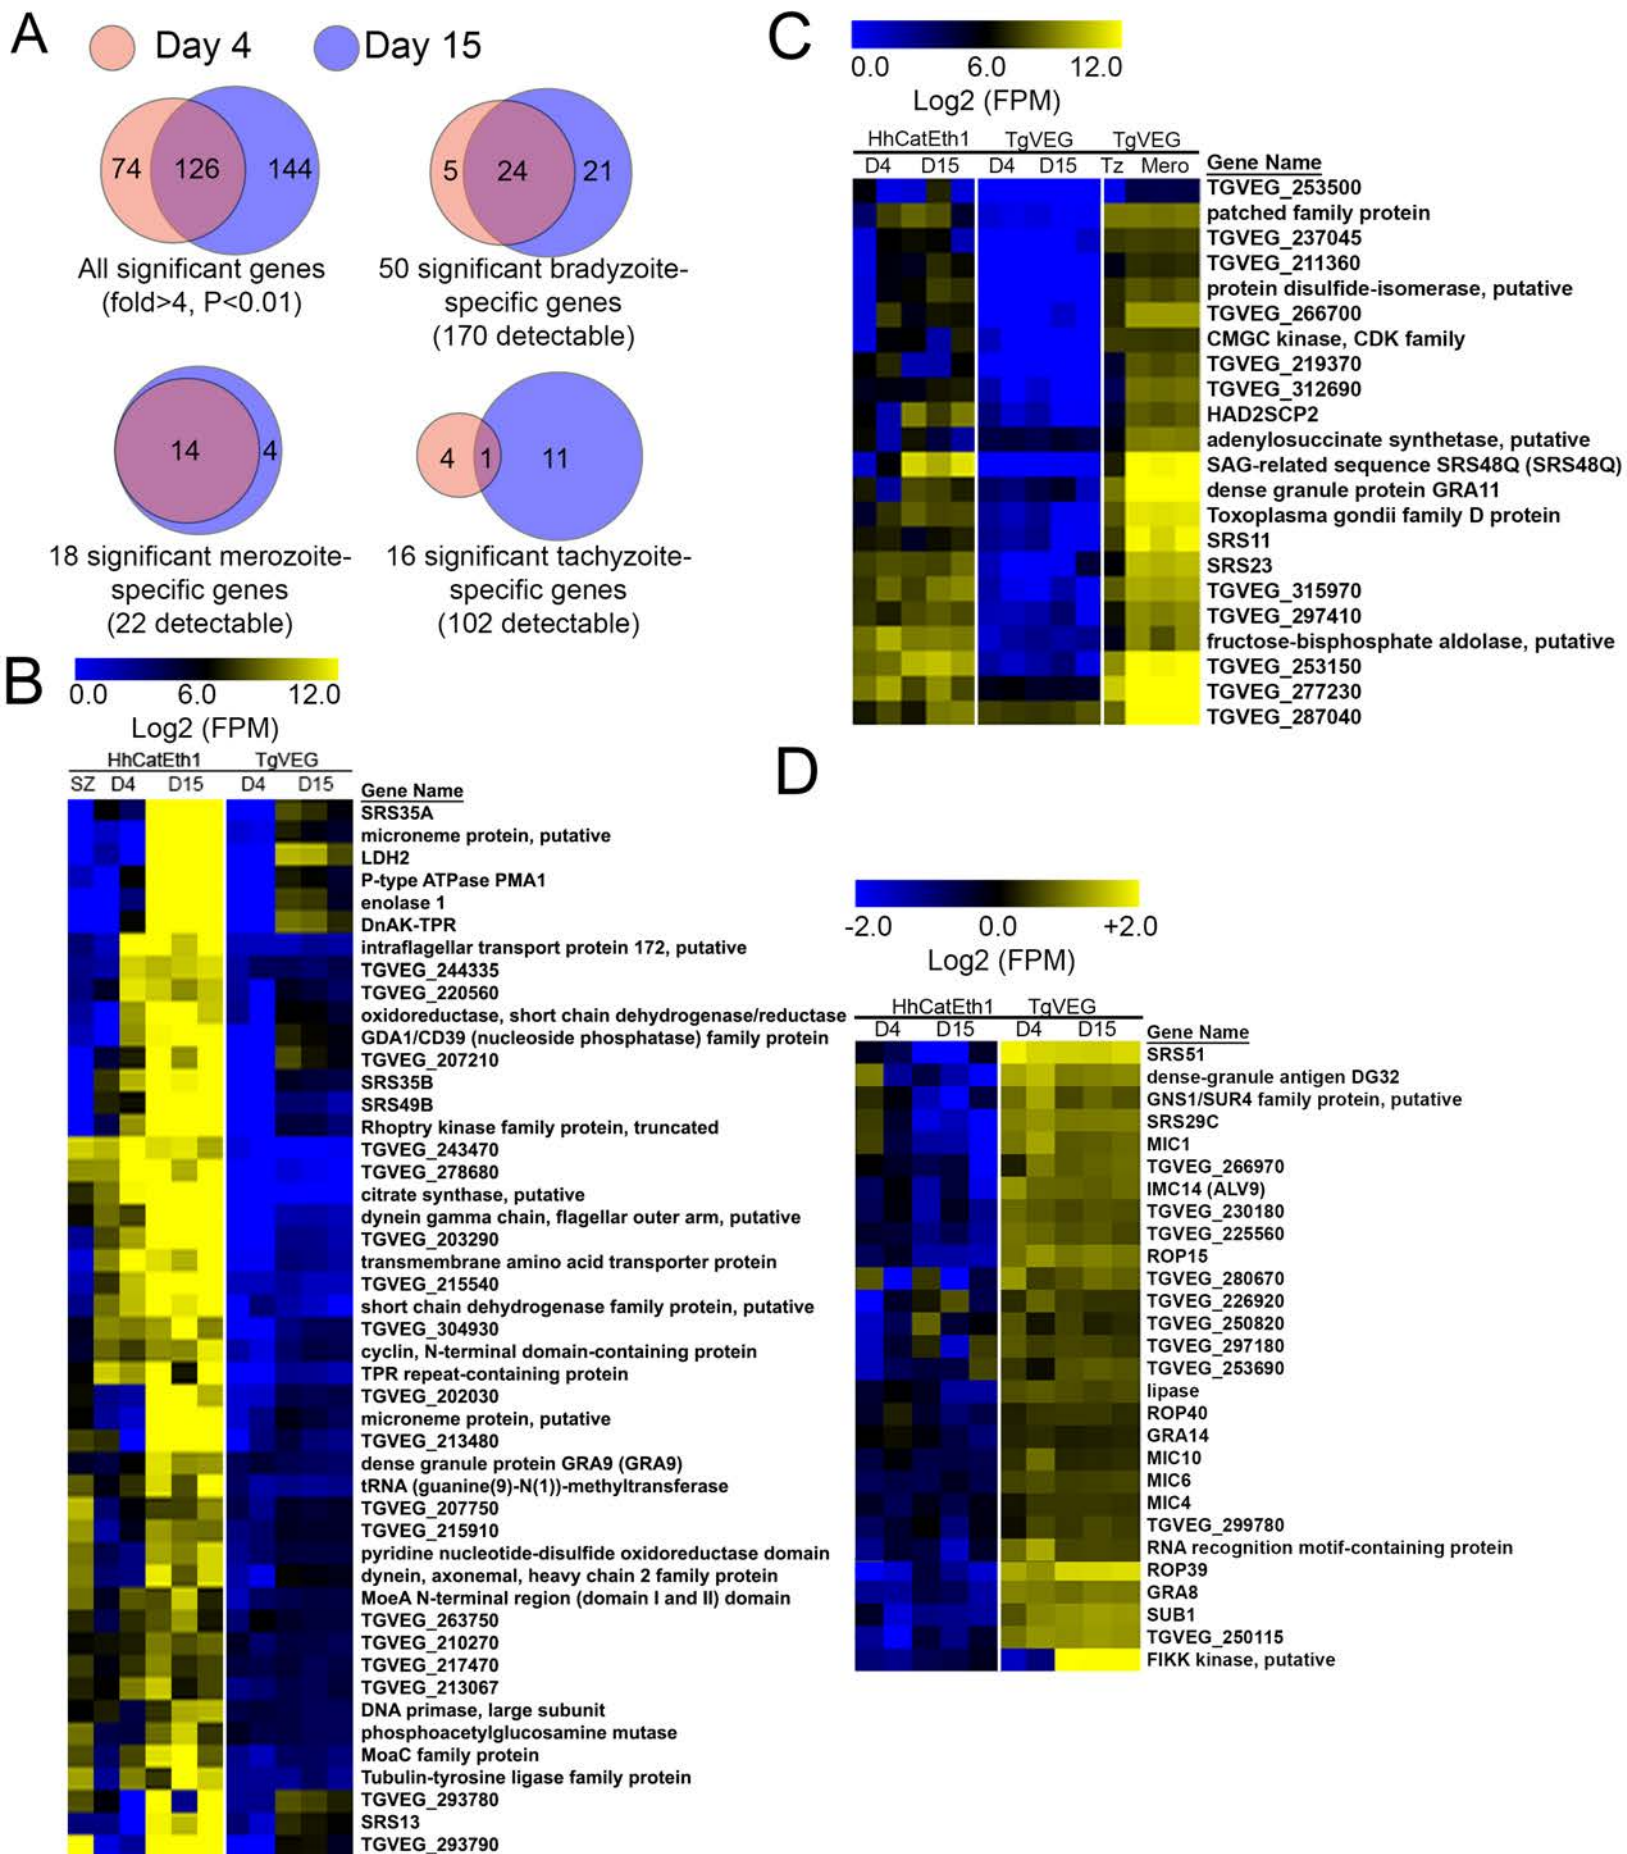





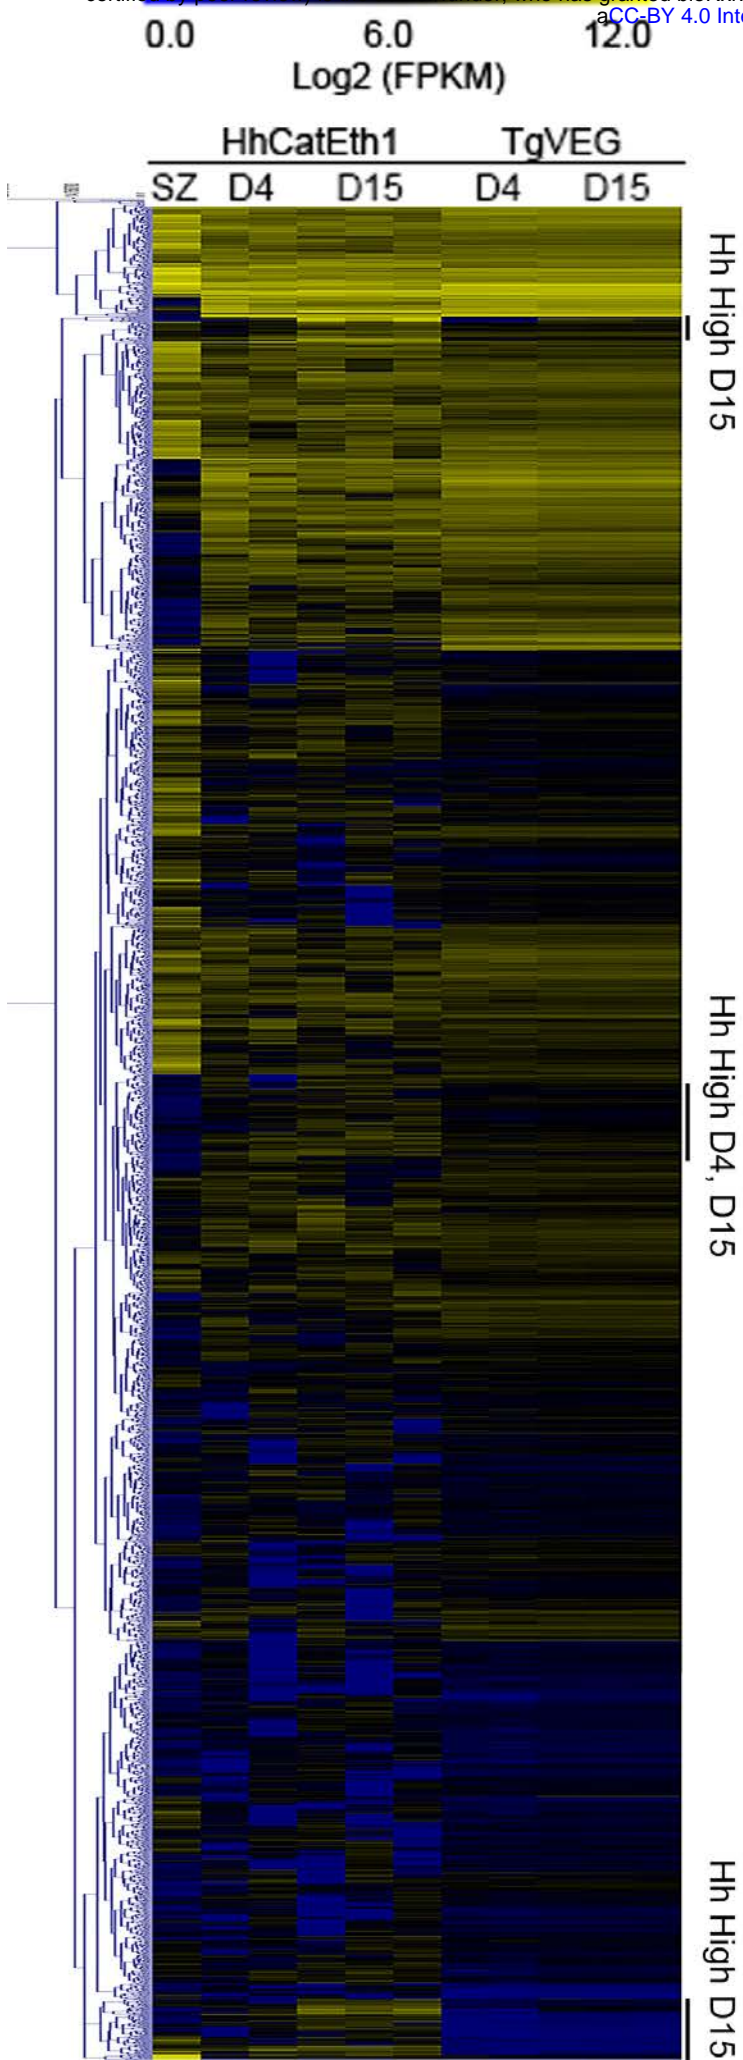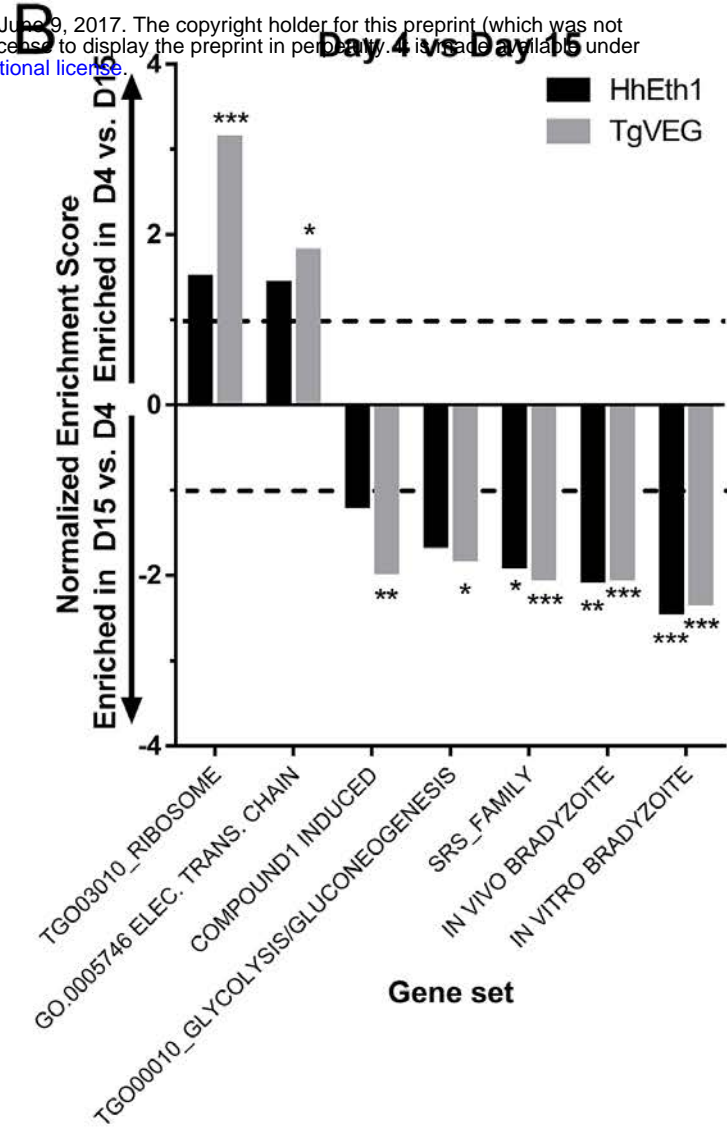



**A**

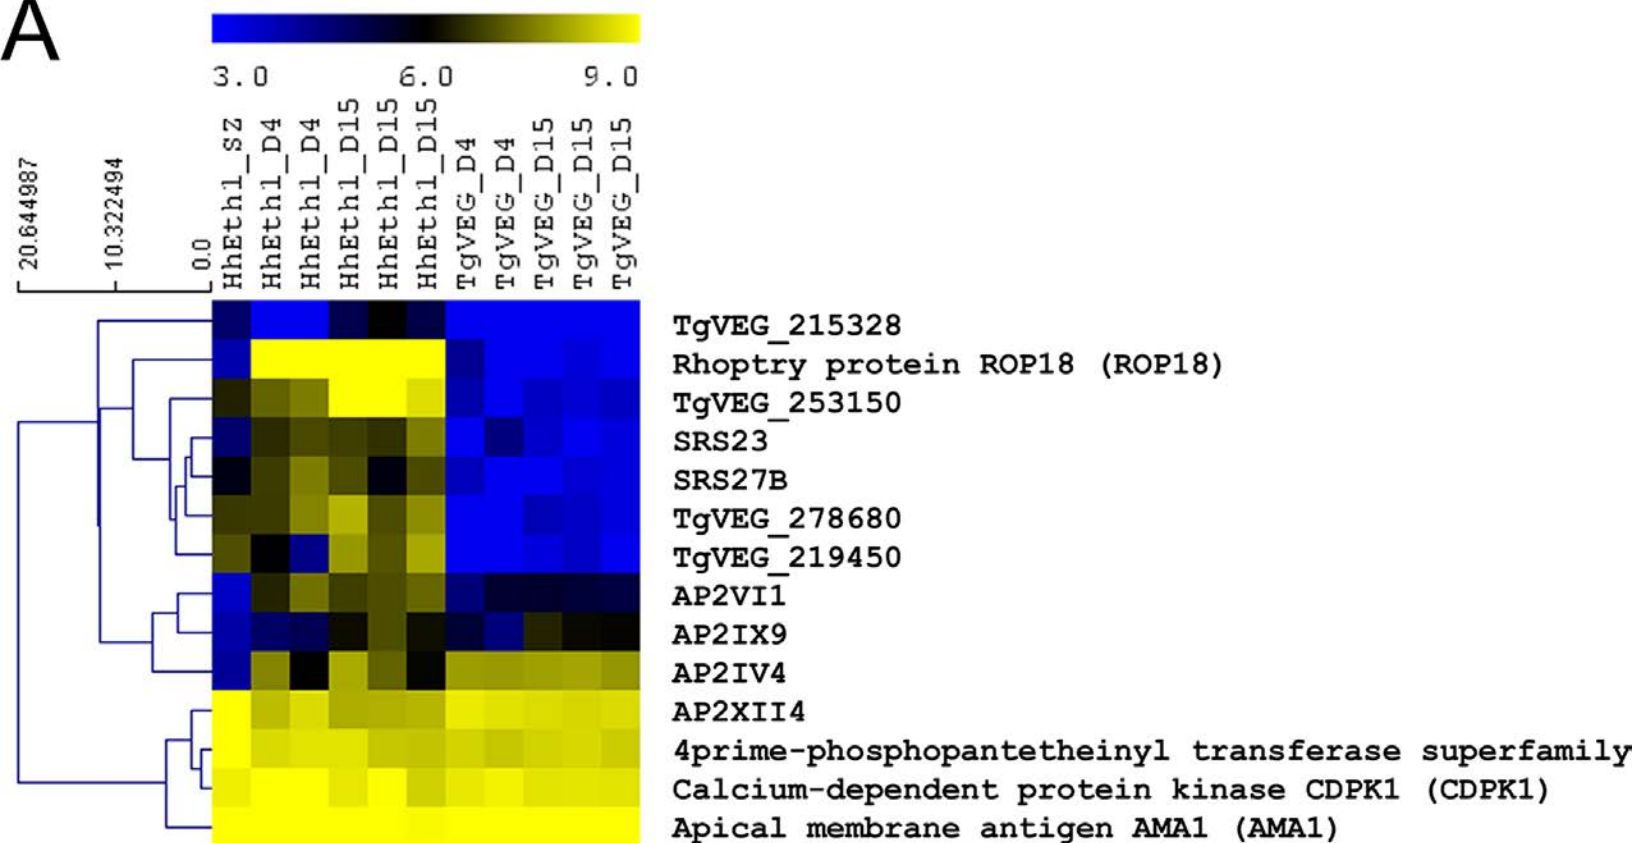

**B**

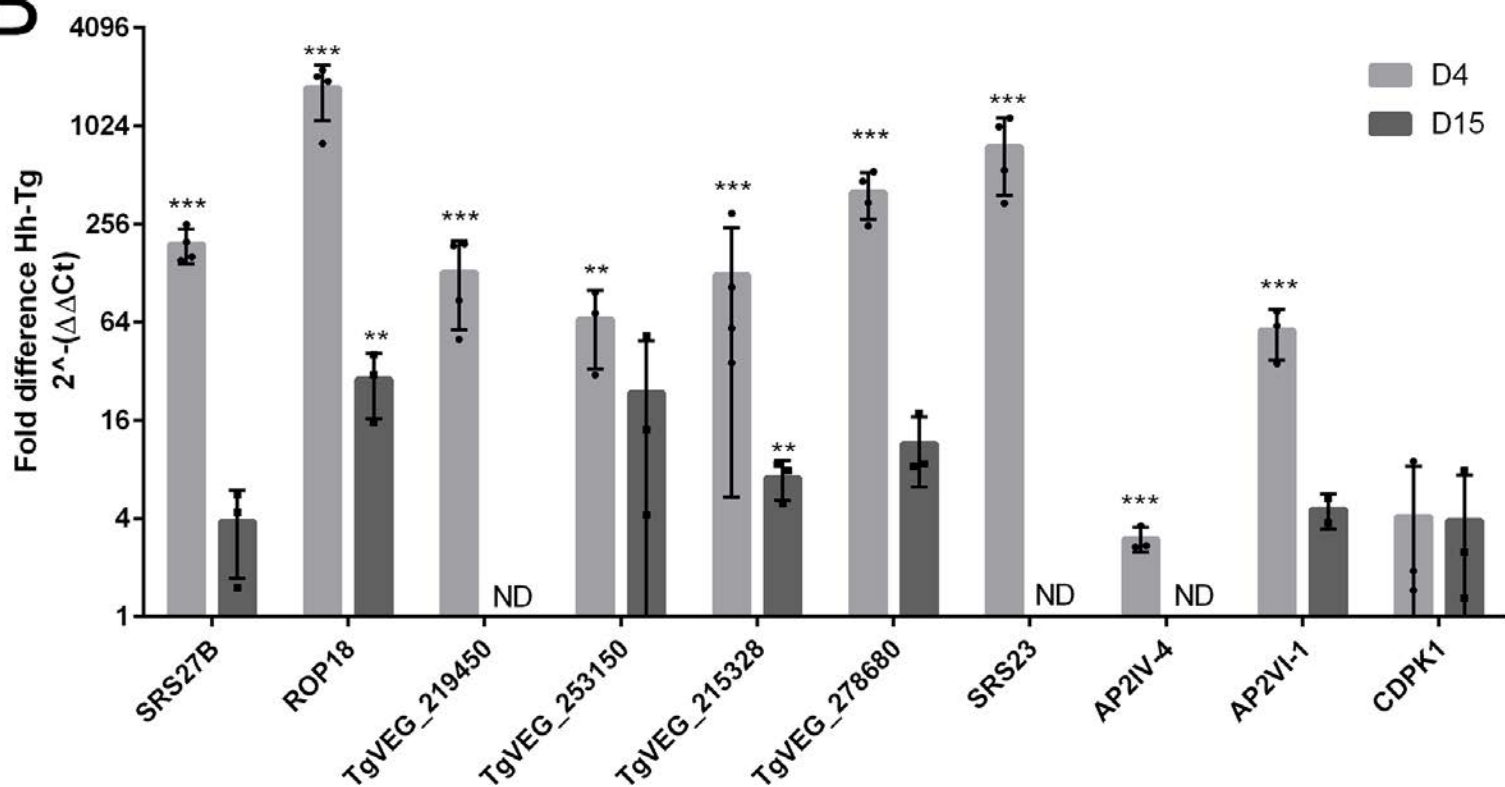

Source: https://www.biorxiv.org/content/10.1101/148270v1.full.pdf
